1 **Title:**

2 Single-cell resolution unravels spatial alterations in metabolism, transcriptome and  
3 epigenome of ageing liver

4

5 **Authors:**

6 Chrysa Nikopoulou<sup>1,\*</sup>, Niklas Kleinenkuhnen<sup>1,2,\*</sup>, Swati Parekh<sup>1,\*</sup>, Tonantzi Sandoval<sup>1</sup>, Farina  
7 Schneider<sup>3</sup>, Patrick Giavalisco<sup>4</sup>, Mihaela Bozukova<sup>1</sup>, Anna Juliane Vesting<sup>5</sup>, Janine Altmüller<sup>6</sup>,  
8 Thomas Wunderlich<sup>5,7</sup>, Vangelis Kondylis<sup>3</sup>, Achim Tresch<sup>2,7,#</sup> and Peter Tessarz<sup>1,7,#</sup>

9

10 **Affiliations:**

11 1: Max Planck Research Group 'Chromatin and Ageing', Max Planck Institute for Biology of Ageing,  
12 Joseph-Stelzmann-Str. 9b, 50931 Cologne, Germany

13 2: Institute of Medical Statistics and Computational Biology, Faculty of Medicine, University of Cologne,  
14 Bachemer Str. 86, 50931, Cologne, Germany

15 3: Institute for Pathology, University Hospital Cologne, Kerpener Str. 62, 50937 Cologne, Germany

16 4: Metabolic Core Facility, Max Planck Institute for Biology of Ageing, Joseph-Stelzmann-Str. 9b, 50931  
17 Cologne, Germany

18 5: Max Planck Institute for Metabolism Research, Gleueler Str. 50, 50931 Cologne, Germany; 6: Cologne  
19 Center for Genomics, University of Cologne, Cologne, Germany; Berlin Institute of Health at Charité,  
20 Core Facility Genomics, Berlin, Germany; Max Delbrück Center for Molecular Medicine in the Helmholtz  
21 Association, Berlin, Germany.

22 7: Cologne Excellence Cluster on Cellular Stress Responses in Aging-associated Diseases (CECAD),  
23 Joseph-Stelzmann-Straße 26, 50931 Cologne, Germany

24 \* equal contribution

25 # correspondence: [achim.tresch@uni-koeln.de](mailto:achim.tresch@uni-koeln.de), [ptessarz@age.mpg.de](mailto:ptessarz@age.mpg.de)

26

27

28

29

30 **ABSTRACT**

31 Epigenetic ageing clocks have revealed that tissues within an organism can age with different  
32 velocity. However, it has not been explored whether cells of one type experience different  
33 ageing trajectories within a tissue depending on their location. Here, we employed lipidomics,  
34 spatial transcriptomics and single-cell ATAC-seq in conjunction with available single-cell RNA-  
35 seq data to address how cells in the murine liver are affected by age-related changes of the  
36 microenvironment. Integration of the datasets revealed zonation-specific and age-related  
37 changes in metabolic states, the epigenome and transcriptome. Particularly periportal  
38 hepatocytes were characterized by decreased mitochondrial function and strong alterations in  
39 the epigenetic landscape, while pericentral hepatocytes – despite accumulation of large lipid  
40 droplets – did not show apparent functional differences. In general, chromatin alterations did  
41 not correlate well with transcriptional changes, hinting at post-transcriptional processes that  
42 shape gene expression during ageing. Together, we provide evidence that changing  
43 microenvironments within a tissue exert strong influences on their resident cells that can shape  
44 epigenetic, metabolic and phenotypic outputs.

45

## 46 INTRODUCTION

47 Ageing is characterised by a general physiological decline that is accompanied by metabolic,  
48 epigenetic and transcriptional changes<sup>1</sup>. A common attribute for these alterations is an  
49 increased inter-individual heterogeneity as observed in large cohorts. Even on an organismal  
50 level within populations of genetically identical individuals, variability seems intrinsically inter-  
51 connected with ageing. For example, in cohorts of *C. elegans* or mice, some individuals die  
52 much earlier than others<sup>2</sup>.

53 It is largely appreciated that transcriptional variability increases with age<sup>3-5</sup>. While whole tissue  
54 omics approaches have been important to get an insight into the uniform changes that occur  
55 on the organ level during ageing, such methods cannot investigate heterogeneity on a cellular  
56 level. It is therefore unresolved whether all cells of the same cell type in a tissue age in the  
57 same way or whether the location of the cells within a tissue matters in this context. The  
58 development of single-cell and spatial omics methods renders it now possible to obtain  
59 (spatially resolved) molecular profiles at close to single-cell resolution, thus providing  
60 promising tools for deciphering the multifaceted process of ageing<sup>6</sup>.

61 The liver is a heterogeneous tissue that consists of hepatocytes arranged in repeating units of  
62 hexagonally shaped lobules. Blood flows into the lobule from portal veins and hepatic arteries  
63 at the corners of the lobules to the central veins. This architecture creates gradients of oxygen,  
64 nutrients and hormones<sup>7</sup>. This gradual change in the lobule's microenvironment is also  
65 referred to as liver zonation<sup>8</sup> and the resulting spatial division of labour is essential for the  
66 optimal function of the liver. For example, the outer highly oxygenated periportal lobule layers  
67 perform mitochondrial-dependent metabolic tasks such as  $\beta$ -oxidation whereas the low  
68 oxygen concentrations at the pericentral areas will drive glycolysis<sup>7</sup>. As hepatocytes are the  
69 primary cells that perform these metabolic processes and their metabolic characteristics  
70 depend on location, the liver is an attractive tissue to address the impact of location and  
71 metabolic state on the ageing trajectory within a dedicated cell type.

72 Here, we employed spatial transcriptomics as well as single-cell ATAC-seq (scATAC-seq) in  
73 conjunction with publicly available single-cell RNA-seq (scRNA-seq) data from ageing mice to  
74 address how ageing of hepatocytes is affected by zonation in the liver. One very obvious  
75 phenotypic difference in the ageing and diseased liver is the deposition of fat, which is mainly  
76 focused around the central vein. Using spatial transcriptomics, we report insights into the  
77 molecular underpinnings of this phenotype, and additionally identify mitochondrial dysfunction  
78 as a potential driver for age-related phenotypes in the periportal region of the liver. While  
79 scATAC-seq can clearly separate young and old hepatocytes, unsupervised clustering  
80 approaches do not separate scRNA-seq profiles based on their age. Yet, age is a relevant  
81 factor for explaining transcriptional variability between cells. Together, the data presented here  
82 shed light on the molecular basis of fat deposition in the ageing liver and serve as a valuable  
83 resource for the hepatic and ageing community.

84

85

## 86 RESULTS

### 87 Spatial Transcriptomics give insights into the zonation-specific and age-related 88 metabolic rearrangements.

89 Transcriptional profiling using bulk RNA sequencing data from the Tabula Muris Consortium<sup>9</sup>  
90 shows metabolic pathways, known to be changing in ageing<sup>10</sup>, with the majority of genes  
91 contributing to alterations in lipid metabolism (Figure S1a,b, Supplementary Table 1). Changes  
92 in lipid metabolism have been described to occur during ageing and the recent development  
93 of lipidomics started to identify corresponding changes in lipid profiles<sup>11</sup>. Liver pathologies that  
94 involve fat deposition, such as non-alcoholic fatty liver disease (NAFLD) show a tendency  
95 towards zoned lipid deposition around the central area<sup>12</sup>, but we were not aware of any  
96 dataset investigating lipid deposition in the ageing liver with respect to the specific zones. To  
97 assess the lipid deposition around the main zones, we performed RNAScope for pericentral  
98 (Cyp2e1, Glul) and periportal markers (Albumin, Cyp2f2)<sup>13</sup> combined with H&E (Hematoxylin  
99 and Eosin) staining in liver isolated from young (3-4 months) and old (18-20 months) mice  
100 (Figure 1a, S1c). Importantly, Sirius red staining showed no profound increase in liver fibrosis  
101 in old livers (Figure S1c). On the contrary, Oil-red-O (O-R-O) staining (Figure S1d, upper  
102 panel) and immunohistochemical (IHC) staining for PLIN2 (Figure S1d, lower panel), a protein  
103 known to be enriched at the outer membrane of LDs<sup>14</sup>, showed that large LDs accumulate  
104 around the central vein in aged livers.

105 The apparent zone-dependent deposition of lipids in the ageing liver prompted us to  
106 investigate the underlying transcriptional events. We used the 10X Genomics Visium Platform  
107 and ran 10µm tissue cryosections from livers of two young and two old mice. The sequencing  
108 metrics of the samples can be found in Supplementary Table 2. Initially, we visualized the  
109 normalized spatial gene expression of the zonation markers Cyp2f2, Cyp2e1 and Glul in young  
110 and old liver (Figure 1b). Based on the expression distribution of these marker genes, spatial  
111 transcriptomics was able to resolve central and portal areas.

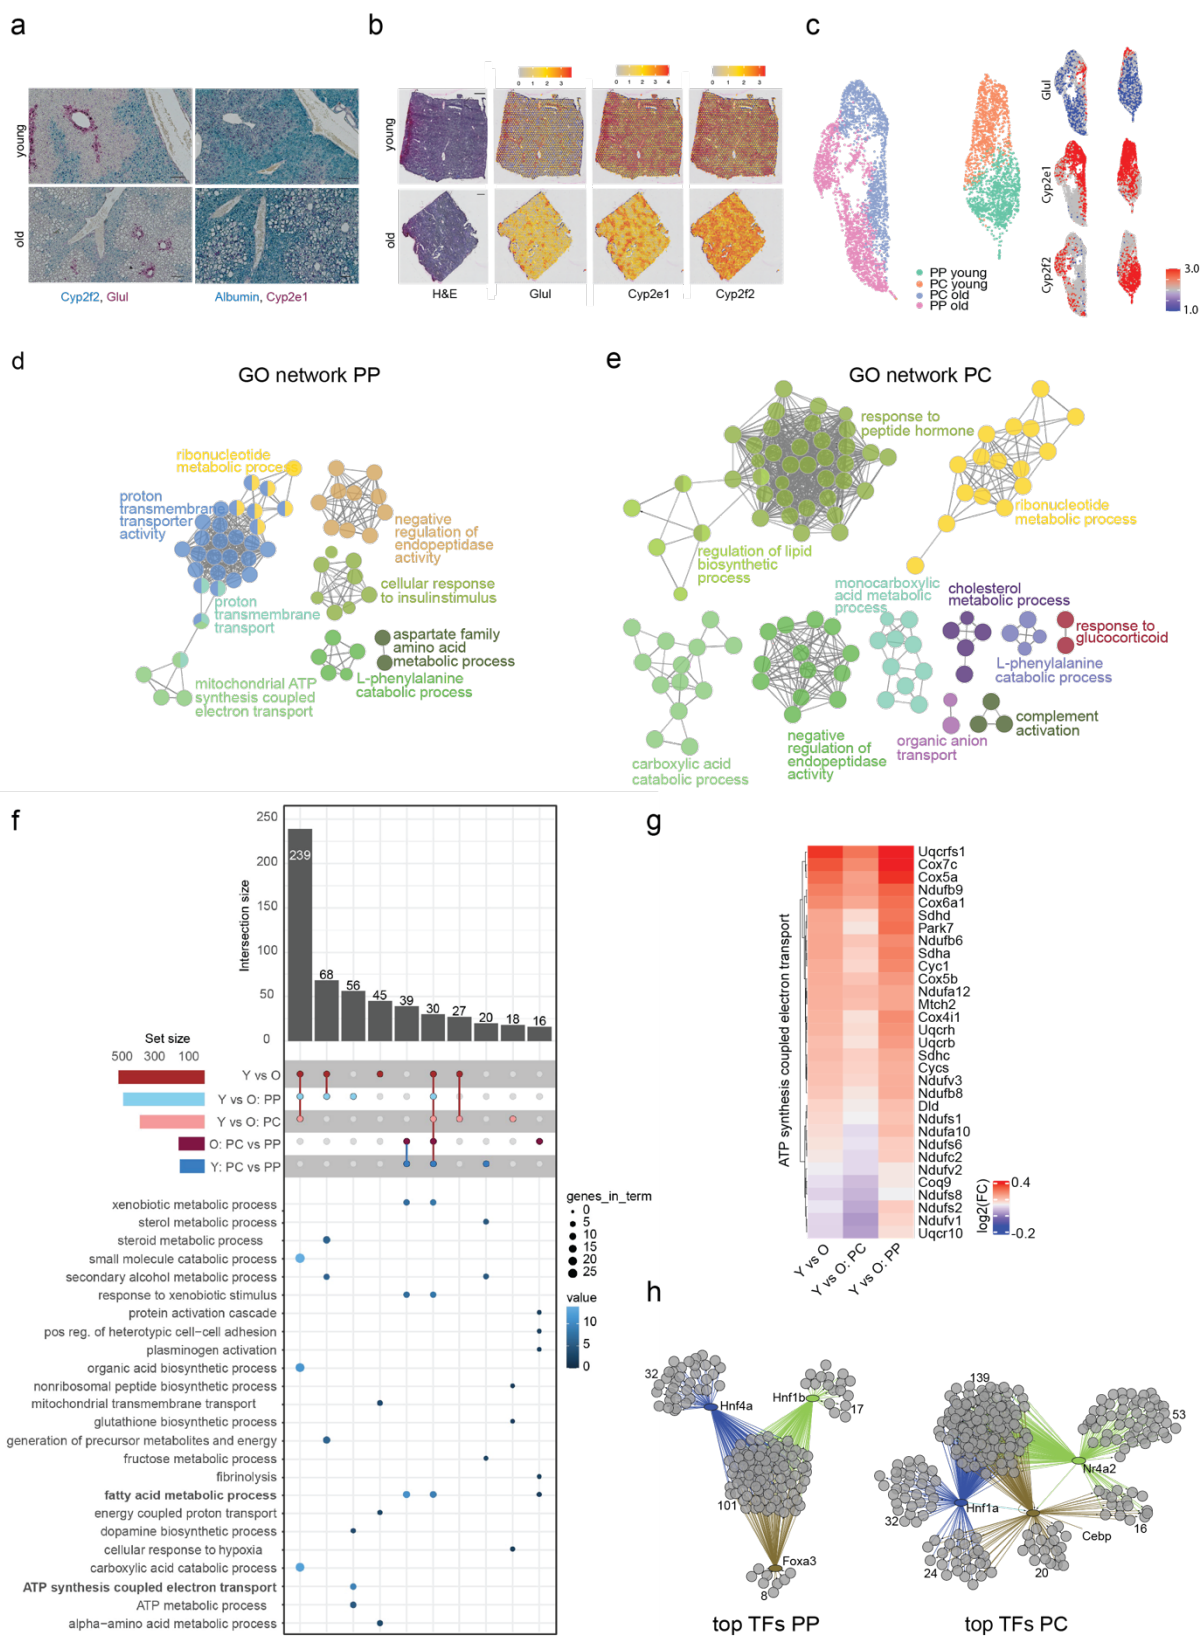

112

113 **Figure 1: Age-related and zonation-specific transcriptional alterations.** a) RNAscope of zone-

114 specific marker genes Glul (magenta, upper panel), Cyp2f2 (cyan, upper panel), Cyp2e1 (magenta,

115 lower panel) and Albumin (cyan, lower panel) in paraffin-embedded liver sections from young (3 month

116 old) and old (18 month old) mice. Scale bar = 100  $\mu$ m. b) H&E staining of one young (upper panel) and  
117 one old (lower panel) liver specimen used for spatial transcriptomics (Scale bar=500  $\mu$ m) and plots  
118 showing the expression levels of Glul, Cyp2f2 and Cyp2e1 indicated by colour. The colour gradient  
119 represents normalised gene expression. c) UMAP projection of the spatial data, colour-coded are the  
120 different zones and ages (left panel) and the expression of Glul, Cyp2e1 and Cyp2f2 (right panel). d),  
121 e) GO network calculated using ClueGO for differentially expressed genes in the periportal (based on  
122 Supplementary Table 3 - for details, see Method section) (d) and pericentral (e) zone of the ageing liver.  
123 f) UpSet plot showing the number of differentially regulated genes (top) and pathways (bottom) in the  
124 indicated categories (Y=young, O=old, PC=pericentral, PP=periportal). g) Heatmap with hierarchical  
125 clustering of differentially expressed genes from the indicated pathways selected from f). g)  
126 Transcription factor activity prediction from the age-dependent differentially expressed genes by the  
127 iRegulon app in Cytoscape (based on Supplementary Table 3 - for details see Methods section). For  
128 each zone, the top predicted TFs are shown as well as their interaction to regulate transcripts. Numbers  
129 indicate the genes in every cluster.

130

131

132 Principal Components analysis showed that spots from each slide cluster; spots from the two  
133 young liver slides overlap, while spots from the two old slides separate (Figure S1e).  
134 Therefore, to guard against batch effects, we integrated young and old datasets individually,  
135 first using canonical correlation analysis<sup>15</sup> and analysing zonal expression effects. Then, we  
136 merged all datasets using the same strategy. To assess whether the sample separation  
137 reflected gene expression differences based on age or were mostly due to a potential batch  
138 effect, we used the loadings calculated in the PCA and intersected those with a recently  
139 published resource, in which global ageing genes were defined organismal and tissue-wide<sup>16</sup>.  
140 The majority of the genes that contributed to the first principal component were part of the  
141 liver-specific global ageing genes (Figure S1f). To perform differential analysis of the PP and  
142 PC zones of the liver tissue, we assigned spots to pericentral and periportal groups based on  
143 Cyp2e1 and Cyp2f2 expression levels (Figure 1c, Methods). We used a two-part, generalised  
144 linear hurdle model<sup>17</sup> to identify gene expression changes between young and old liver in

145 general, but also specifically in periportal and pericentral region upon ageing (Supplementary  
146 Table 3). We performed GO enrichment using the ClueGo plugin for Cytoscape<sup>18,19</sup> for the  
147 age-related changes in the two zones. While the periportal region was characterized by  
148 changes in mitochondrial respiration and proton transport as well as amino acid metabolism  
149 (Figure 1d), ontologies in the pericentral zone were enriched for terms related to lipid  
150 biosynthesis and carboxylic acid catabolic processes (Figure 1e). Common for both zones  
151 were changes in ribonucleotide metabolism and response to peptide hormones, such as  
152 insulin (Figure 1d,e). To further zoom into the differences of the zones, and to identify  
153 commonly and zone-specifically deregulated genes, we represented the data as an UpSet plot  
154 (Figure 1f). This analysis confirmed the notion of zone-specific alterations. The periportal area  
155 showed age-related expression changes of genes encoding for members of the electron  
156 transport chain, for example an age related decrease in *Uqcrcfs1* (cytochrome b-c1), which  
157 catalyses the electron transfer from ubiquinol to cytochrome *c*<sup>20</sup>, and *Cox7c* or *Cox5a* that  
158 drive oxidative phosphorylation<sup>21</sup> (Figure 1g). On the other hand, the pericentral area showed  
159 a signal of hypoxia, which might be caused by the previously reported changes in liver  
160 vascularisation upon ageing<sup>22</sup>. Finally, we wanted to understand whether the transcriptional  
161 changes were driven by a dedicated set of transcription factors. We used the iRegulon app  
162 within Cytoscape<sup>18,23</sup> and visualised the top three most significant TFs (NES >4) based on  
163 age-dependent differential expression within the two zones. Shared between the zones is  
164 *Hnf1*, which has been shown to regulate many hepatic genes<sup>24</sup>. Genes in the periportal area  
165 were predicted to be regulated by *Hnf4a* and *Foxa3* (Figure 1h). *Hnf4a* is a master regulator  
166 during hepatic differentiation and plays an important role during liver regeneration<sup>25</sup>, similarly  
167 to *Foxa3*<sup>26</sup>. In addition, *Hnf4a* has recently been shown to possess anti-proliferative capacity  
168 and thus protects against hepatocellular carcinoma<sup>25</sup>. On the other hand, genes in the  
169 pericentral zone were predicted to be regulated by *Cebp* and *Nr4a2* (Figure 1h), two TFs that  
170 regulate glucose and lipid metabolism<sup>27,28</sup>. Taken together, spatial transcriptomics revealed  
171 that ageing is accompanied by zonation-specific metabolic rewiring, which is driven by a  
172 network of dedicated transcription factors.



173 **The ageing liver is characterised by lipid remodelling and loss of spare respiratory**  
 174 **capacity in periportal mitochondria**

175 The spatial transcriptomic data suggested age-related metabolic alterations that depend on  
 176 the location of cells with respect to central or portal regions. To gain more insight into the  
 177 metabolic alterations, we first performed lipidomics to characterise the changes in lipid  
 178 metabolism within the ageing liver. This approach allowed us to address not only storage and  
 179 membrane lipids, but also to analyse levels of cardiolipins and ubiquinones to further  
 180 investigate the observed alterations in mitochondrial metabolism.

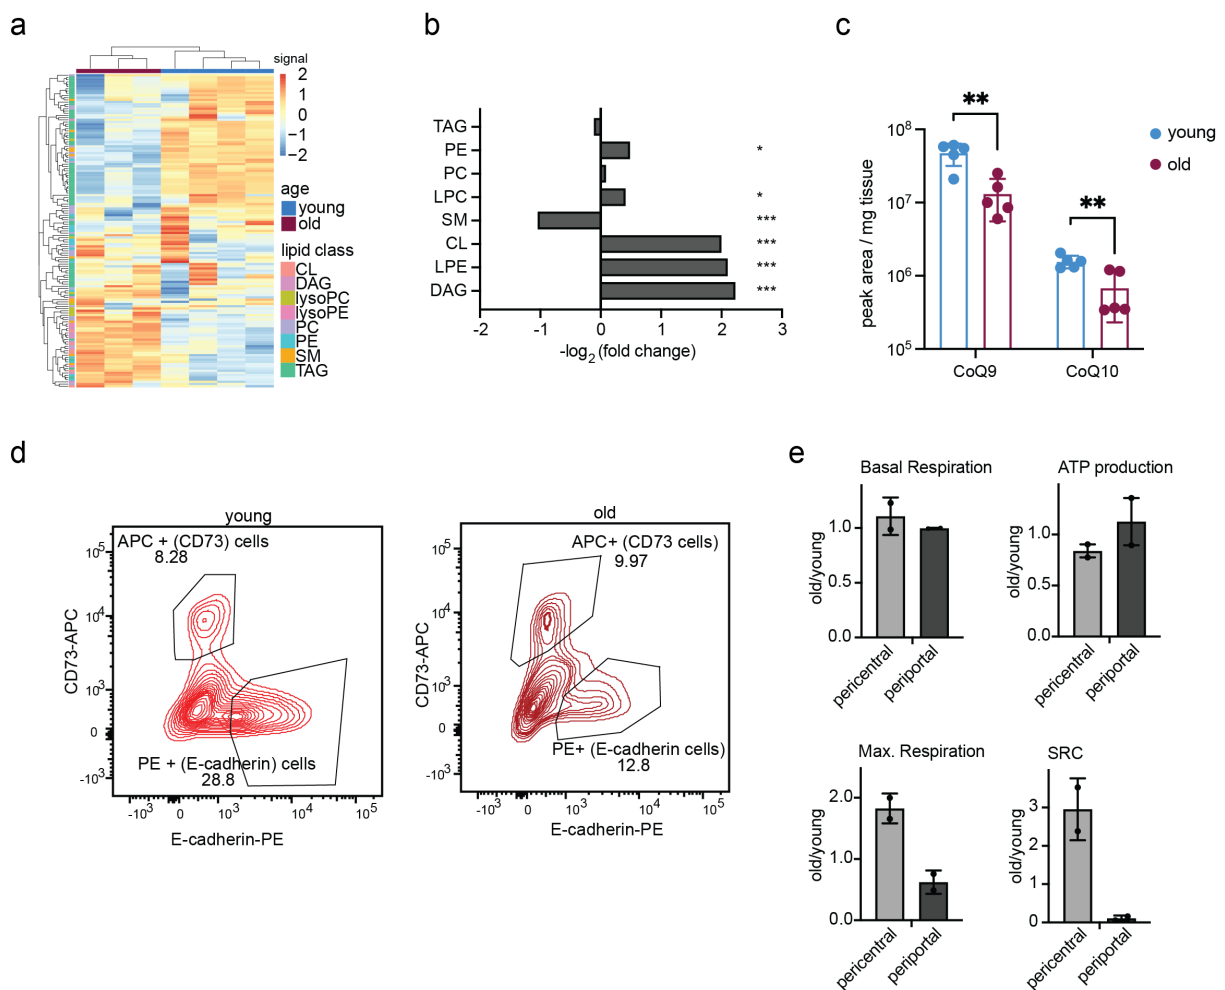

181  
 182 **Figure 2: Lipid remodelling and alterations in mitochondrial metabolism in the ageing liver. a)**  
 183 Heatmap with hierarchical clustering of lipid datasets derived from 3 old and 4 young mouse livers,  
 184 showing the differentially expressed classes of lipids. Hierarchical clustering was performed using  
 185 LipidSig<sup>29</sup> based on data available in Supplementary Table 4. b) Bar plot of the log-fold changes in lipid  
 186 classes expressed in old vs. young liver. Fold changes and significance (\*p-value < 0.05, \*\*\*p-

187 value<0.001) were calculated using LipidSig based on data available in Supplementary Table 4. c) Bar  
188 plot showing the expression of Ubiquinones CoQ9 and CoQ10 in young and old liver. Statistical  
189 significance was determined using a two-sample t-test (\*\*p-value<0.01). d) Exemplary FACS profiles of  
190 sorted hepatocytes based on CD73 (pericentral) and E-Cadherin (periportal). e) Mitochondrial function  
191 as measured by Seahorse Mitochondrial Stress kit (parameter on top of graph) expressed as old vs  
192 young and pericentral-periportal. N=2 (per N, one or two young and two old mice were sorted and  
193 averaged). Error bars represent the SEM.

194

195

196 We extracted lipids from livers of young and old mice. PCA (Figure S2a) and differential  
197 abundance analysis of the most significantly changed lipids (Figure 2a, Supplementary Table  
198 4) showed a strong lipid remodelling for most of the major lipid classes. While we did not  
199 observe an overall increase in triacylglycerides (TAGs), we noted a significant increase in the  
200 levels of lysoPE (LPE) and lysoPC (LPC) (Figure 2b), which might stem from the remaining  
201 serum in the liver as those lipids are enriched in extracellular fluids<sup>30</sup>. Importantly, we noted  
202 a strong increase in diacylglycerides (DAGs) and a decrease in sphingomyelin (SM) (Figure  
203 2b), pointing towards changes in membrane fluidity<sup>31,32</sup> and lipid-mediated signalling. Indeed,  
204 an increase in DAGs as well as a decrease in SMs has been linked to an increase in insulin  
205 insensitivity, a well-known hallmark of ageing<sup>33,34</sup> and a pathway that was also evident in the  
206 spatial transcriptomics data (Figure 1d,e). We then focused on mitochondria-related lipids. A  
207 significant increase in all cardiolipins (CL) measured (Figures 2b, S2b) indicated changes in  
208 the composition of mitochondrial membranes and hence the function of mitochondrial inner  
209 membrane proteins, including the electron transport chain (ETC)<sup>35</sup>. This hypothesis was also  
210 supported by the observation that ubiquinones, lipids that transfer the electron between the  
211 different complexes of the ETC, were strongly down-regulated with age (Figure 2c). These  
212 findings in combination with the spatial transcriptomics data supported the hypothesis of age-  
213 dependent mitochondrial changes. As the spatial transcriptomic data and the lipidome analysis  
214 pointed towards a strong impact on mitochondrial metabolism, we wanted to investigate this

215 phenotype in more detail, particularly in a zone-specific manner. In order to do this, we used  
216 a previously published protocol<sup>36</sup> to sort hepatocytes into pericentral and periportal upon  
217 perfusion of the liver (Figure 2d, S2c). This approach depends on the zonation-dependent  
218 expression of E-cadherin (periportal) and CD73 (Nt5e, pericentral)<sup>36</sup> and was able to separate  
219 pericentral and periportal hepatocytes as judged by expression of Glul and Cyp2f2 (Figure  
220 S2d). First, we measured mitochondrial content in the two zones in an age-dependent manner,  
221 which was variable across different animals and zones, but largely unaltered with age (Figure  
222 S2e). Finally, we performed Seahorse analysis using the mitochondrial stress kit to assess  
223 mitochondrial function. While basal respiration and ATP production changed only mildly with  
224 age, we observed a striking reduction in the maximal and thus, spare respiratory capacity  
225 (SRC) in periportal hepatocytes (Figure 2e). On the other hand, pericentral hepatocytes  
226 showed an increase in maximal respiration. Loss of SRC sensitizes the cells to surges in ATP  
227 demand<sup>37</sup> and it has been proposed that SRC can be used as a measure of mitochondrial  
228 health<sup>38</sup>. Taken together, spatial data, lipidomics and bioenergetics measurements point  
229 towards an age-dependent decrease in hepatic mitochondrial fitness and function, specifically  
230 in the periportal zone of the liver.

231

### 232 **Chromatin accessibility in mouse liver carries a hepatocyte ageing signature**

233 Having defined the transcriptional, lipid and functional alterations that occur within the  
234 periportal and pericentral zones of the ageing liver, we next wanted to investigate if the  
235 differences in phenotype and transcriptome might be explained by an underlying change on  
236 the epigenetic level. Therefore, we performed scATAC-seq using the 10x Chromium platform.  
237 We profiled 4838 nuclei prepared from three young liver tissues and 3361 nuclei from three  
238 old liver tissues. Sequencing metrics can be found in Supplementary Table 3. In order to  
239 identify cell types and their accessibility profiles, we combined the young and old datasets and  
240 subsequently analysed them together using cisTopic<sup>39</sup>. Clustering according to cell-to-cell  
241 similarity using UMAP identified several cell clusters. Most of the clusters showed intermixing

242 between young and old cells. However, the biggest cluster showed a clear separation between  
 243 the two age groups (Figure 3a).

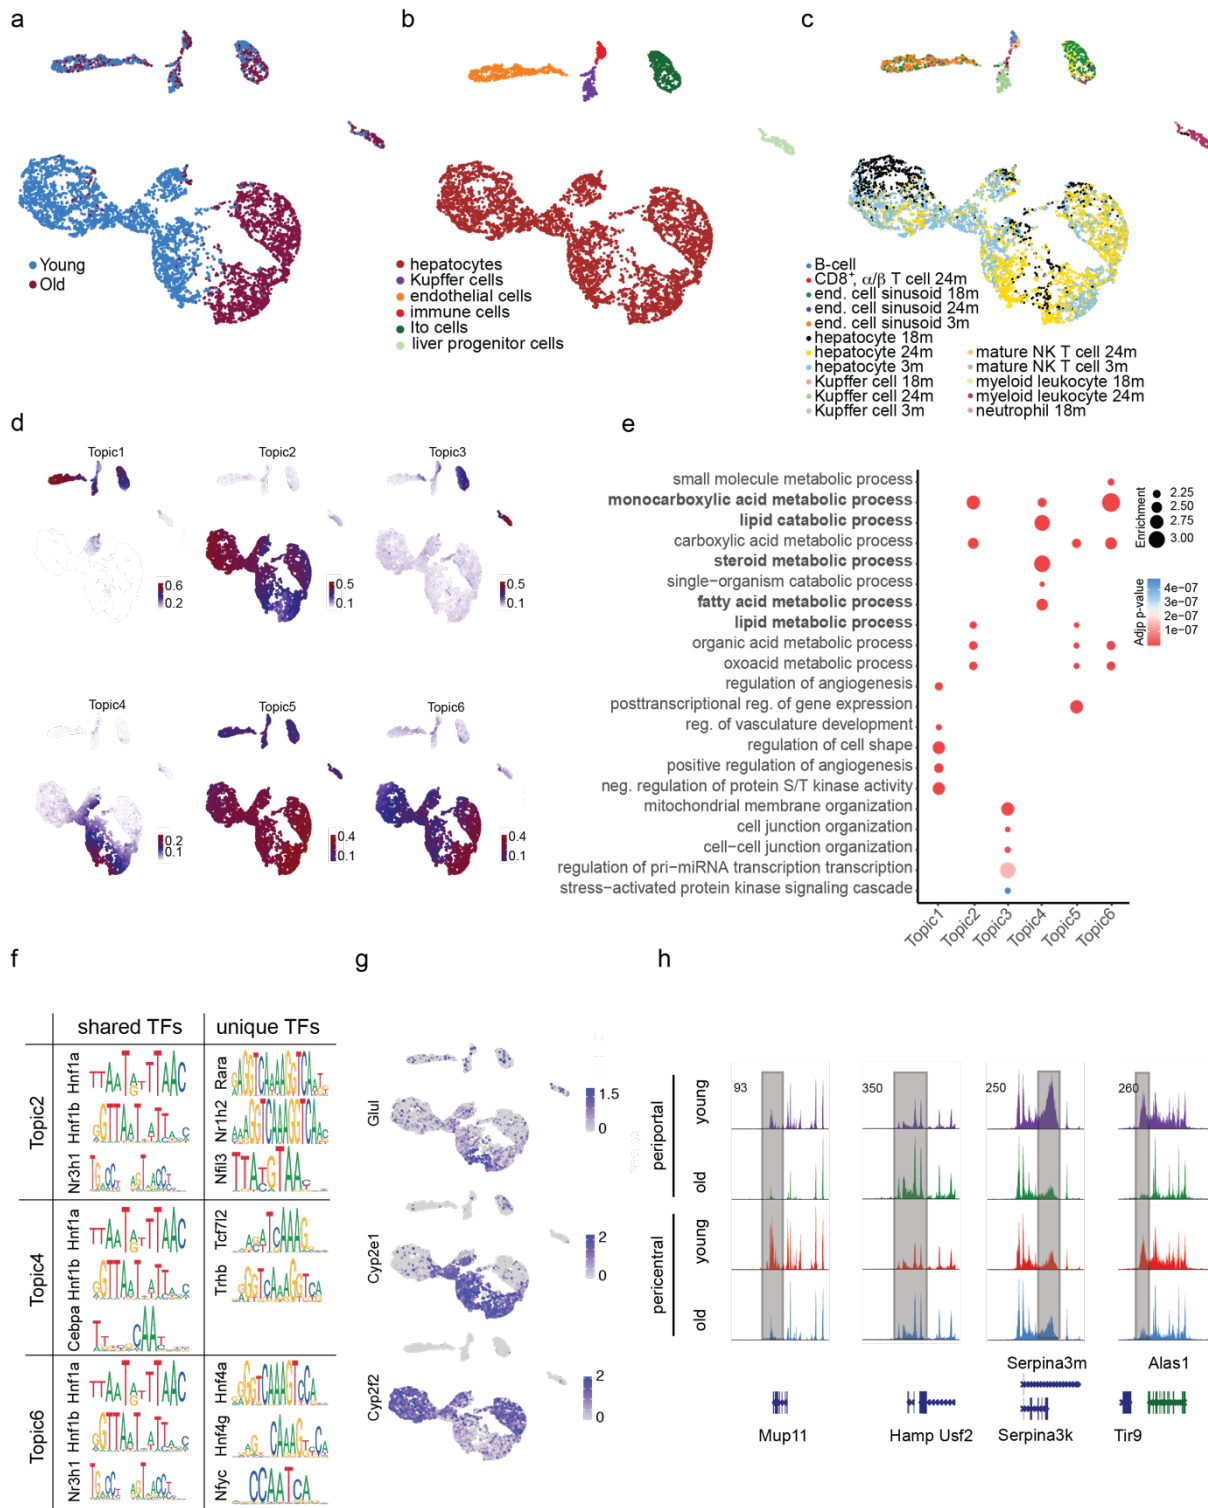

244

245 **Figure 3: Differential chromatin accessibility in aged liver hepatocytes.** a-c) UMAP projection of  
 246 scATAC-seq data of mouse liver nuclei. a) Different colours represent liver cells from young and old  
 247 age groups identified using cisTopic. b) Different colours represent different cell types based on imputed

248 marker gene activity (see also Supplementary Figure S3C). c) Different colours represent different cell  
249 types predicted with cell type assignment using the FACS data of the TMS<sup>9</sup> d) cisTopic identified six  
250 different topics. Colour code of the UMAPs is according to the normalised topic score for each cell. e)  
251 GO term analysis of the 6 different topics. Highlighted are liver-associated metabolic processes. f)  
252 Shared and unique transcription factor (TF) motifs corresponding to the “hepatocyte” topics 2, 4 and 6.  
253 g) UMAP projections as in A. Colour code corresponds to the imputed gene activity of zone-specific  
254 genes *Glul*, *Cyp2e1* (pericentral) and *Cyp2f2* (periporal). h) Exemplary tracks of differentially accessible  
255 sites between pericentral and periportal hepatocytes upon ageing. The grey bar indicates altered  
256 regions.

257

258 This behaviour was confirmed by a complementary clustering using Signac<sup>40</sup> (Figure S3a). To  
259 identify cell types, we inferred transcriptional activity from the respective promoter  
260 accessibility, as described previously<sup>41</sup>. We used known marker genes<sup>13,42</sup> and CellMarker  
261 (<http://bio-bigdata.hrbmu.edu.cn/CellMarker/>) to infer the cellular identity of each cluster. We  
262 were able to resolve all expected cell types of the liver, except for cholangiocytes (Figure 3b,  
263 S3b-c). We were not able to distinguish different immune cell types since their marker genes’  
264 imputed activity was ambiguous (Figure 3b, S3b,c). In line with the observation that the livers  
265 were not fibrotic, we did not observe a significant increase in immune or hepatic stellate cell  
266 numbers based on the scATAC-seq profiles or detected a specific inflammatory signal.  
267 Notably, based on the marker gene profiles, the only cluster clearly separated by age was the  
268 hepatocyte one (Figure 3a,b, S3a,b). Regions that changed accessibility with age encoded for  
269 genes involved in pathways such as glucose homeostasis and fat-cell differentiation (Figure  
270 S3d). To further validate our chromatin-state-based cell type assignment, we predicted cell  
271 types of our scATAC-seq data with FACS-based scRNA-seq (Smart-seq2) data from the TMS  
272 consortium<sup>9</sup>. The integration largely confirmed our cell type prediction (Figure 3c). However,  
273 we noticed that particularly hepatocytes were not predicted clearly in different age groups.

274 Next, we made use of the inferred *cis*-regulatory topics that underlie the Latent Dirichlet  
275 Allocation (LDA) used by cisTopic<sup>39</sup> and assigned those topics to the individual clusters. Most

276 topics referred to specific cell clusters. Four topics were enriched in the hepatocyte cluster  
277 (Figure 3d). In line with the predicted cell types, GO terms associated with the hepatic topics  
278 centred around lipid and xenobiotic metabolism, the epithelial topic around angiogenesis and  
279 vasculature development, whereas the other topics were mostly associated with regulatory  
280 terms (Figure 3d). Interestingly, topics 2 and 6 correspond to young and old hepatocytes,  
281 respectively, whereas topic 4 was shared between the two age groups. Topics were further  
282 exploited to predict enriched transcription factor motifs. Here, we particularly focused on the  
283 three hepatic topics (Figure 3f, Supplementary Table 5). In topics 2, 4 and 6 well-known  
284 hepatic transcription factors were predicted, such as Hnf1a,b (see also Figure 1h). Each topic  
285 also contained its unique set of transcription factors that were specifically predicted to topic-  
286 defining regions. In topic 2, which was enriched predominantly in the young hepatocytes, we  
287 identified unique TFs to be Nr1h2, which is involved in steroid metabolism as well as Nfil3,  
288 which controls Per1 and Per2 and is thus involved in circadian rhythm. Recent work has  
289 highlighted the importance of the circadian clock during the ageing process, and changes in  
290 the clock dynamics are particularly altered in the ageing liver<sup>43</sup>. The shared topic 4 was  
291 characterised by TFs involved in b-catenin and Wnt signalling, Tcf7l2 and Trhb, which is linked  
292 to b-catenin production through thyroid signalling<sup>44</sup>. Finally, topic 6, which is enriched in old  
293 hepatocytes, contained Hnf4a as a predicted unique TF. These unique transcription factors  
294 predicted for each of the topics implied very specific regulation of metabolic and signalling  
295 pathways with age. In general, the enriched transcription factor motifs were in good agreement  
296 with the prediction based on the zone-specific and age-dependent differential expression  
297 (Figures 1h and 3f, Supplementary Table 5). The apparent age-dependent separation  
298 between topics 2 and 6 and their respective enrichment in young or old liver prompted us to  
299 investigate whether liver zonation might be associated with the topics' separation. To test this,  
300 we imputed the gene activity of Glul, Cyp2e1 and Cyp2f2. Remarkably, there is a very clear  
301 separation in the scATAC-seq feature plots (Figure 3g). Using the apparent activity level of  
302 these three marker genes, we concluded that topic 4 represented the pericentral region,  
303 whereas topic 2 described the chromatin state for young periportal hepatocytes and topic 6

304 encompassed mostly old hepatocytes. The loss of a clearly defined periportal cluster is  
305 interesting and might be connected to the change in mitochondrial metabolism. Changes in  
306 mitochondrial metabolism have been shown to perturb stem and somatic cell function in  
307 ageing<sup>45,46</sup> and may lead to dysfunction of hepatocytes and other resident liver cells in the  
308 periportal area. The differences in accessibility between the zones with respect to peak  
309 enrichment can also be seen in other representative gene loci (Figure 3h). Taken together,  
310 scATAC-seq is able to reveal changes in the epigenome of single-cells and can resolve  
311 zonation-specific differences in chromatin states.

312

### 313 **Specific Cidea expression in the periportal zone is driven by chromatin architectural** 314 **changes**

315 How do chromatin alterations connect to the transcriptional program to drive age-related  
316 phenotypes? To address this question in more detail, we initially inspected the differentially  
317 expressed genes (periportal - 544; pericentral 429) that were changed with age. Intriguingly,  
318 we identified two members of the Cide gene family (Cidea and Cidec, or Fsp27) to be  
319 upregulated specifically in old pericentral hepatocytes (Figure 4a,b). Cideb on the other hand  
320 was expressed across both ages and zones. We used this gene family as paradigm to  
321 understand the connection between chromatin, transcription and phenotype as the expression  
322 showed a very clear distribution. In addition, all three Cide proteins have been shown to bind  
323 to LDs and to modulate LD dynamics<sup>47-49</sup>. Overexpression of Cidec in hepatocytes was  
324 sufficient to generate large LDs<sup>48,50</sup> and using electron microscopy, we found that the median  
325 size of LDs increased 4-fold with age (Figure 4c), which correlated well with the increased  
326 pericentral expression of Cidea and Cidec. We then turned to our scATAC-seq dataset and  
327 probed whether there was an underlying alteration in accessibility at the Cidea locus,  
328 potentially explaining the increase in expression. Indeed, we observed a specific age-  
329 dependent increase in accessibility at the Cidea locus (Figure 4d). Co-accessibility analysis  
330 using Cicero<sup>51</sup> also identified the enhanced usage of a potential intronic enhancer within Cidea  
331 as marked by H3K27ac (Figure 4d).

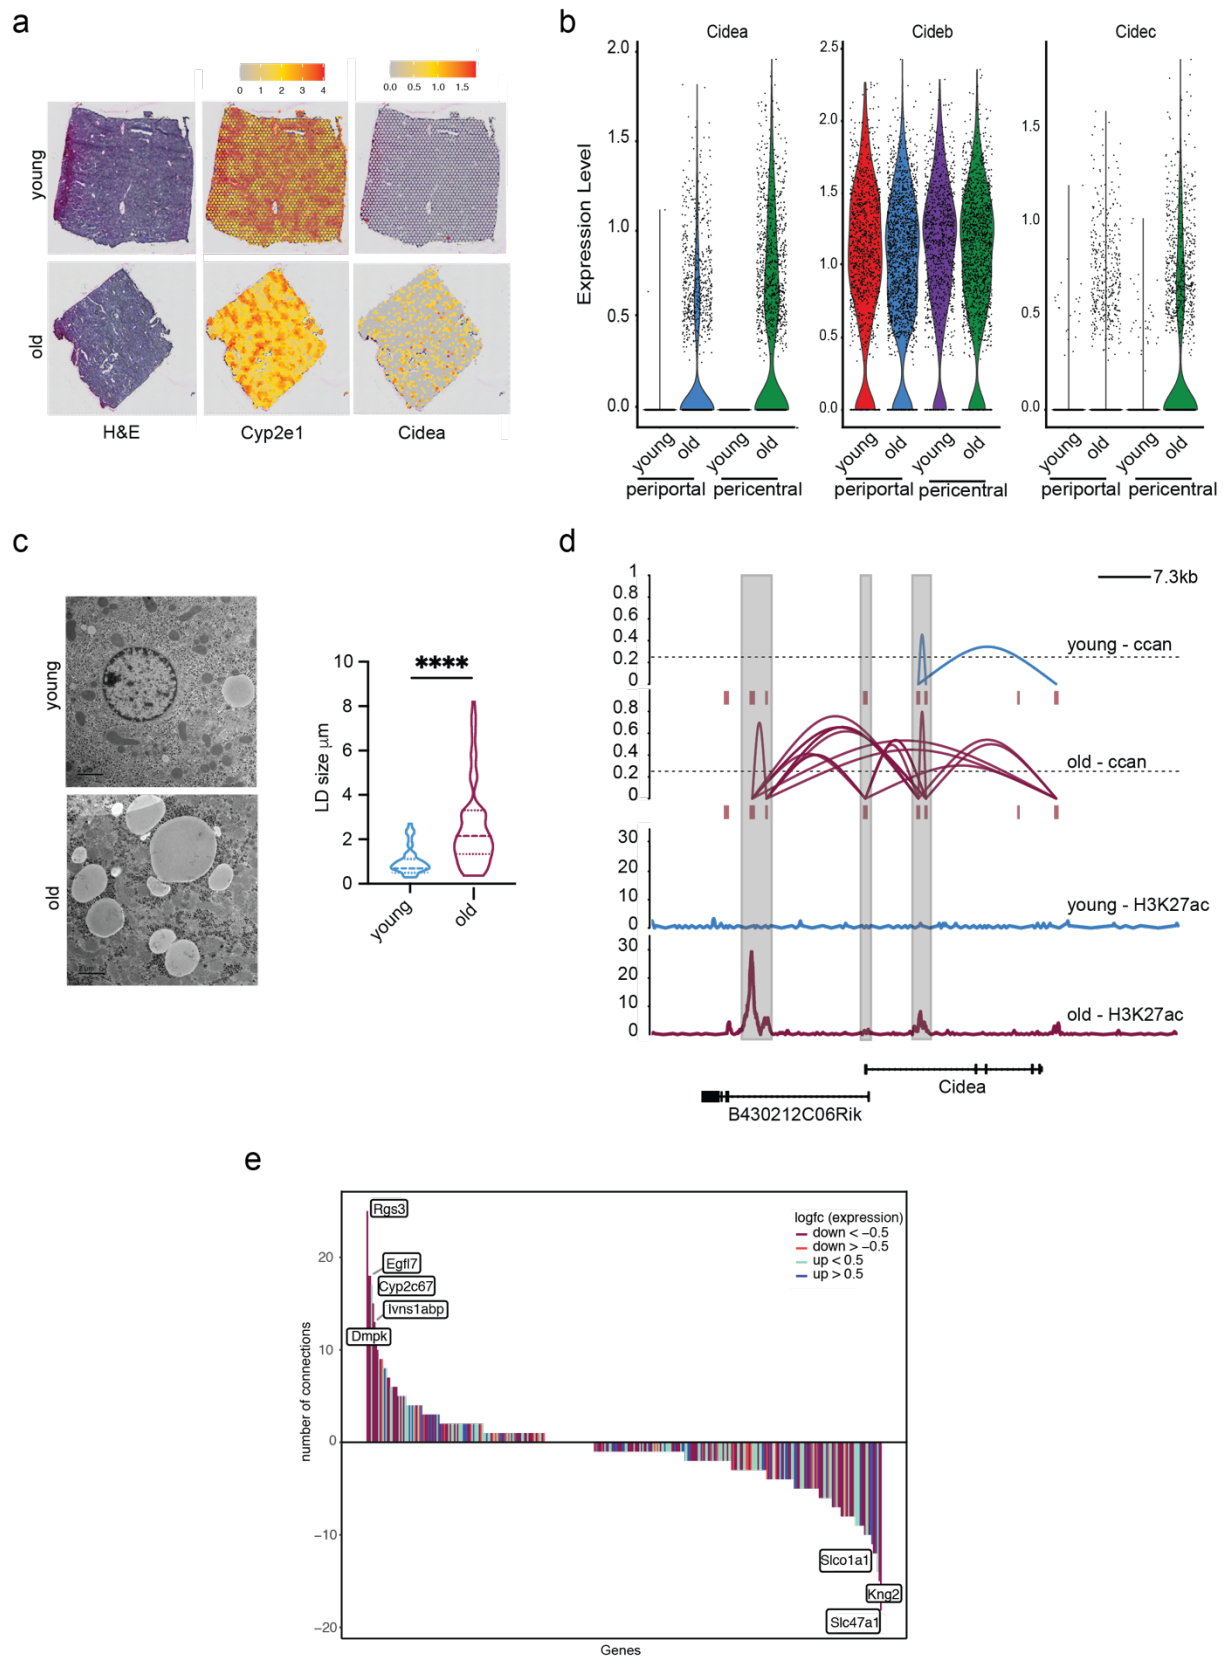

332

333 **Figure 4: Connection between chromatin and transcriptional alterations in the ageing liver. a)**

334 H&E staining of one young (upper panel) and one old (lower panel) liver specimen used for spatial

335 transcriptomics and a plot showing the expression level of Cidea. Please note that H&E stain and



336 Cyp2e1 plots are identical to Figure 1b and used here for reference only. The colour gradient represents  
337 normalised gene expression. b) Violin plots indicating the expression levels of Cidea, Cideb and Cidec  
338 across pericentral and periportal regions in young and old liver. c) Transmission electron micrograph of  
339 lipid droplets (LDs) of young and old liver tissue. Representative images at 3000x, scale bar = 2  $\mu$ m.  
340 ImageJ quantification of the mean LD diameter size in  $\mu$ m from ten randomly selected photos from a  
341 young (LD n=104, mean=0.8771) and ten from an old (LD n=88, mean=2.611) mouse specimen.  
342 Statistical significance was determined using an unpaired two-tailed t-test; \*\*\*\*p-value<0.0001. d) Ccan  
343 values based on Cicero<sup>51</sup> prediction of co-accessibility (upper panel) and the enhancer mark H3K27ac  
344 (lower panel) at the Cidea locus in young and old mouse liver. Highlighted in grey are potential enhancer  
345 and promoter regions from Cidea and its associated antisense long non-coding RNA, respectively. e)  
346 Age-related changes in co-accessibility of loci identified using spatial transcriptomics. Y-axis shows the  
347 differences in predicted contact points between young and old hepatocytes. Colour of the graphs  
348 highlight direction of gene expression change as taken from the spatial transcriptomics data  
349 (Supplementary Table 3) between young and old.

350

351 Given the apparent correlation between locus opening, potential enhancer engagement and  
352 transcription output at the Cidea locus, we next asked whether changes in co-accessibility  
353 might be a good predictor for differential gene expression on a global scale. We used the list  
354 of 482 differentially expressed genes between young and old and calculated the difference in  
355 chromatin accessibility for those genes (Figure 4f, Figure S4). In line with previous reports<sup>52</sup>,  
356 we did not detect a general correlation between an increase in co-accessibility and  
357 transcription, indicating that co-accessibility is not a determinant for transcription. We noted  
358 as well that in many cases the levels of H3K27ac did not change with age, indicating that  
359 enhancer marking and co-accessibility do not necessarily go hand-in-hand (Figure S4). Taken  
360 together, integration of scATAC- with scRNA-seq data confirms that alterations in chromatin  
361 states are linked to gene expression differences. However, on a global level, we observed a  
362 disconnect between chromatin alterations and transcriptional output, suggesting some  
363 decoupling of chromatin states and transcription with age.

364

365 **Cellular heterogeneity in gene expression but not in chromatin states increases with**  
366 **age**

367 The observation that co-accessibility and transcription were not correlated in general (Figure  
368 3f) and the finding that scRNA-seq data did not fully identify the age of cells during cell type  
369 prediction (Figure 3c) suggested that there is a decoupling between chromatin architecture  
370 and steady-state levels of mRNA in ageing hepatocytes. To identify the underlying reason for  
371 this observation, we investigated the decoupling between chromatin and the transcriptome.  
372 We initially projected the available data on liver tissue from the Tabula Muris senis consortium  
373 as a UMAP, which was generated using either the 10x Genomics platform (droplet data) or  
374 using flow cytometry and Smart-seq2 (FACS data). Consistent with the outcome of the cell  
375 type prediction, the clustering based on scRNA-seq data did not resolve the different age  
376 groups, while it clearly separated the different liver tissue cell types (Figure 5a,b). This effect  
377 can also be observed in a PCA (Figure 5c) and remained apparent when focussing exclusively  
378 on hepatocytes (Figure 5d). Such a lack of ageing signature during clustering can be observed  
379 in other reports as well<sup>53,54</sup>. A few studies have linked organismal and cellular ageing to  
380 transcriptional variability and cell-to-cell gene expression heterogeneity<sup>3,55</sup>. Thus, we  
381 wondered if an increase in cell-to-cell heterogeneity would potentially mask any underlying  
382 transcriptional ageing signature in scRNA-seq data. For simplicity, we initially focused on the  
383 major cell type of the liver, hepatocytes. First, we fit a linear model for the first three PCs with  
384 age, taking into consideration biological independent experiments in the form of mouse identity  
385 (two mice per condition) as a confounding factor (Figure S5a). We calculated the adjusted  $R^2$   
386 to quantify how well each PC explained age (Figure 5e) which remains under 25%. However,  
387 the noise explained as a sum of residual squares significantly increased in old cells (Figure 5f,  
388 Methods). Together, this analysis indicated that on a global level, only ~22% of the expression  
389 patterns (variance) could be explained by age and the heterogeneity of hepatocytes strongly  
390 increased with age. To assess this in all other liver-resident cell types, we fit a linear model  
391 taking into consideration cell type as an additional variable. Noise increased in all cell types  
392 with the notable exception of B cells, which showed a decrease in noise with age (Figure S5b).

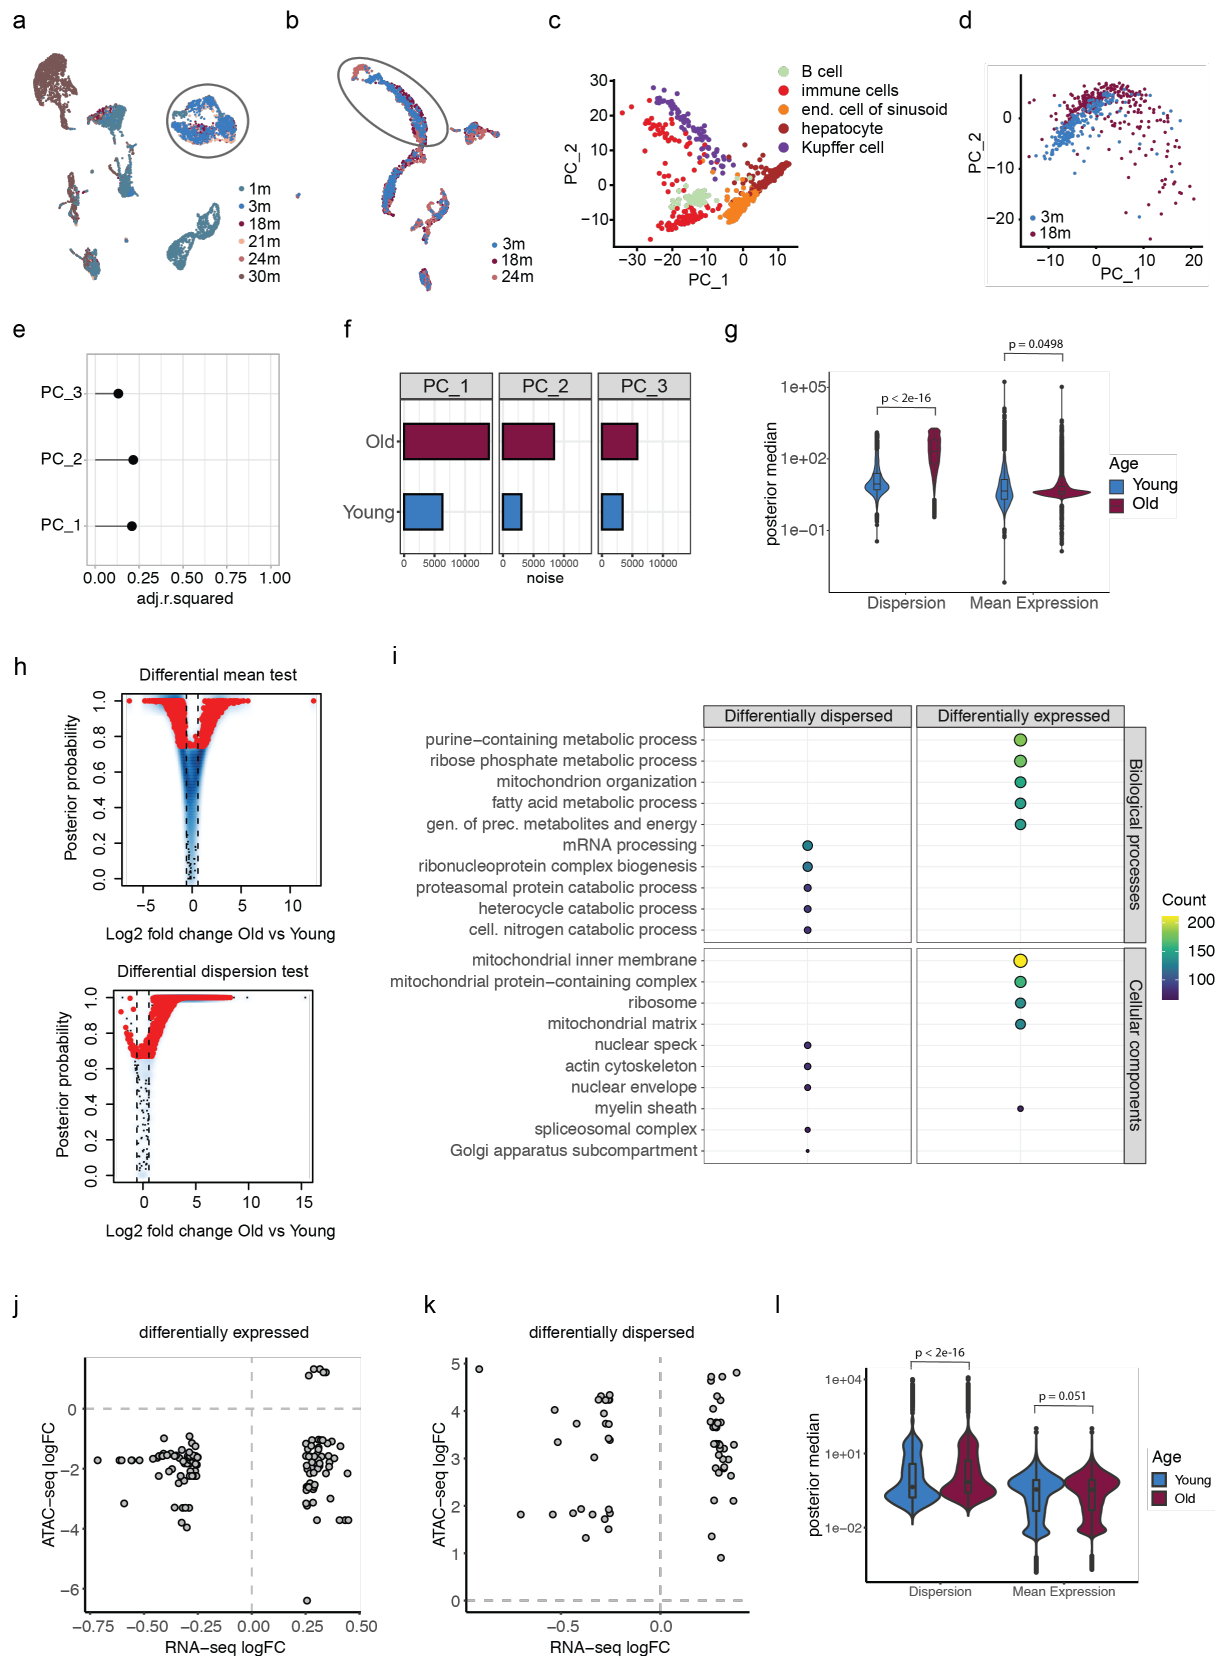

393

394 **Figure 5: Transcriptional variability in hepatocytes increases with age.** UMAP projection of Tabula

395 Muris Senis (TMS) male a) 10x Genomics-based and b) FACS data coloured by age. Hepatocytes are

396 marked with a circle. c) PCA projection of TMS male FACS data coloured by cell types and d)

397 hepatocytes coloured by age. e) Adjusted  $R^2$  of the linear model fit of age and mouseID with the first  
398 three PCs (see Figure S4A). f) The sum of residual squares for each linear model fit to the first three  
399 PCs colored by age g) The posterior medians of mean expression ( $\mu$ ) and over-dispersion ( $\delta$ )  
400 parameters estimated by a regression model from BASiCS coloured by age. P-values were calculated  
401 using a Welch Two Sample t-test. h,i) Log2 fold changes (x-axis) of significantly differentially expressed  
402 and over-dispersed genes with the differential accessibility log2 fold changes (y-axis) measured from  
403 scATAC-seq data. j) scATAC-seq gene activity matrix was used to estimate mean expression ( $\mu$ ) and  
404 over-dispersion ( $\delta$ ) parameters using a regression model from BASiCS colored by age. P-values  
405 were calculated using a Welch Two Sample t-test. k) Differential expression and variability was  
406 determined between young and old hepatocytes. For each gene, the difference in mean expression and  
407 over-dispersion is estimated as log2 fold-change (x-axis) and the posterior probability (y-axis) where  
408 the red highlighted genes are significantly differentially expressed or dispersed. l) Top biological  
409 processes (upper panel) and cellular components (lower panel) enriched in the differentially dispersed  
410 (left) and differentially expressed (right) genes (Supplementary Table 6).

411

412 To identify genes that contributed to the age-dependent increase in noise, we used a  
413 regression model implemented within BASiCS<sup>56,57</sup>. As shown in our previous analysis, the  
414 overall distribution of mean expression remained similar while dispersion was observed to be  
415 significantly higher in old cells, as suggested by the median posterior estimates of young and  
416 old hepatocytes (Figure 5g). By this means, we were able to compare the differential variability  
417 between young and old cells for the genes with similar mean expression. The differential test  
418 obtained 5545 and 6537 genes significantly differentially expressed and dispersed,  
419 respectively (Supplementary Table 6).

420 The expression difference was found to be nearly symmetrical, with 2448 up- and 3097 genes  
421 down-regulated in old cells. With respect to variability, virtually all (6487 of 6537) genes  
422 showed significantly higher dispersion in old cells (Figure 5h). We further filtered the  
423 differentially over-dispersed genes for minimum 5% detection rate in each age group and  
424 mean overall expression 5 to account for low expression or detection rate, which retained 2020  
425 significantly over-dispersed genes in old hepatocytes. Strikingly, differentially expressed and

426 dispersed genes showed a clear functional separation with respect to pathways affected  
427 (Supplementary Table 6). GO enrichment analysis showed that an increase in cell-to-cell  
428 variability was associated with genes involved in mRNA processing RNP complex biogenesis  
429 (Figure 5i), indicating that genes involved in gene expression regulation showed a particular  
430 increase in variability with age. On the other hand, differentially expressed genes were  
431 enriched for GO terms that deal with metabolic processes, translation and mitochondrial  
432 organisation (Figure 5i). This finding was supported by the similar results from KEGG pathway  
433 enrichment (Figure S5c). When compared to the bulk RNA-seq data (Figure S1a,b), the over-  
434 dispersed genes contributed to 27.06% of the differentially expressed genes and 32.4% of the  
435 dispersed genes overlapped with the global ageing genes<sup>16</sup>. Finally, we carried out the same  
436 analysis with the TMS Droplet and FACS data of female hepatocytes at 3 and 18 months of  
437 age. We observed very similar effects in ageing female hepatocytes regardless of the scRNA-  
438 seq approach (Figure S5d). The overall dispersion was higher in aged cells and additionally,  
439 the functional network was found to be the same with >75% of the genes also overlapping  
440 between the datasets.

441 The cell type prediction of scATAC-seq data with the TMS scRNA-seq data did not resolve  
442 cell type age. Because of this apparent decoupling of chromatin state and transcription, we  
443 next correlated differential expression and dispersion in RNA with differential accessibility in  
444 chromatin. We did not observe any correlation between RNA expression changes and  
445 chromatin states (Figures 5j,k). Finally, we decided to investigate if chromatin itself would  
446 show an increase in dispersion with age and performed BASiCS on the gene activity matrix of  
447 the scATAC-seq data (for details see Materials and Methods). In contrast to scRNA-seq, we  
448 did not observe an apparent increase in dispersion with age (Figure 5i), suggesting that  
449 chromatin states are less heterogeneous than the transcripts. This difference in the dispersion  
450 might also be one underlying reason for the observed decoupling between RNA and chromatin  
451 states in the single-cell data. In summary, we observed a very strong increase in cell-to-cell  
452 variability over age in the regulatory gene network, potentially masking mean expression

453 differences and hindering the ageing signature from being detected by single-cell gene  
454 expression analysis.

## 455 **DISCUSSION**

456 The question of how the direct microenvironment of a cell within a tissue affects the ageing  
457 trajectory has not been extensively explored. A few studies investigated the role of the  
458 microenvironment, particularly on the fate of tissue-resident stem cells, in which age-  
459 dependent perturbations of e.g. the vascular niches trigger the loss of functional hematopoietic  
460 stem cells and osteoprogenitors<sup>58</sup>. Indeed, general attrition of vascularisation has been  
461 recently reported occurring in multiple organs, including the liver<sup>22</sup> indicating that tissue  
462 microenvironments experience profound alterations with age. This is in line with the  
463 observation that ageing is accompanied by a decline in blood flow in the liver<sup>59</sup>. Given the  
464 importance of the vascular system in setting up the division of labour of hepatocytes, the liver  
465 represents an ideal tissue to address the consequences of tissue organisation and location on  
466 one cell type.

467 Next to the insights into the connection of micronenvironmental changes and metabolic as  
468 well as epigenomic changes in the ageing liver, the data represent a valuable resource for  
469 researchers interested in liver organisation. While the scATAC-seq data will allow the  
470 interrogation of chromatin states in most of liver-resident cell types, the spatial transcriptomics  
471 data will mostly give insight into hepatic functions as the hepatocyte are dominating the  
472 transcriptional profiles on the spots. However, manual inspection of marker cell types indicates  
473 that also the spatial data can be used to interrogate non-parenchymal cells, particularly  
474 Kupffer, endothelial and stellate cells (Figure S6).

475 The most apparent and macroscopic alteration with ageing to liver physiology is the  
476 accumulation of large LDs in a zonated pattern, with the bulk of LDs being localised in  
477 hepatocytes around the central vein of the liver lobule. Using spatial transcriptomics we  
478 explored the age-dependent changes that occur within the central to portal axis of the liver

479 lobule. Interestingly, we identified members of the Cide gene family to be predominantly  
480 upregulated in the central area of the liver lobule. Cidea, Cideb and Cidec are important  
481 regulators of LD dynamic and growth. Indeed, an increase in expression of Cidec has been  
482 shown to lead to growth of LDs<sup>60</sup>, suggesting that the increase in Cidea and Cidec expression  
483 might be one underlying reason for the increase in LD size with age. The changes in Cidea  
484 expression are also encoded in the epigenome. As our scATAC-data provided enough  
485 resolution to investigate zonation- and age-dependent differences, we could show that the  
486 locus encoding for Cidea is remodelled with age and co-accessibility increased. The presence  
487 of H3K27ac indicated that during ageing, an intronic enhancer is associated with the  
488 pericentral increase of Cidea expression in hepatocytes. Such an increase of expression in  
489 Cidea and Cidec has also been linked to the development of hepatic steatosis<sup>61,62</sup> and  
490 prolonged hepatic lipid storage can lead to metabolic dysfunction in the liver and inflammation.  
491 Ultimately, this development can lead to advanced forms of non-alcoholic fatty liver disease  
492 (NAFLD)<sup>63</sup>. Thus, it is no surprise that ageing is the most common cause for the progression  
493 of NAFLD.

494 Interestingly, the strong accumulation of large LDs in the pericentral region did not go hand-  
495 in-hand with major chromatin rearrangements. In fact, pericentral hepatocytes from young and  
496 old liver were called to belong to one topic only, indicating that their chromatin states were  
497 similar. On the other hand, young and old periportal hepatocytes differed sufficiently enough  
498 in their chromatin state to be enriched for different topics. Our lipidomic and spatial  
499 transcriptomic analysis might provide an explanation for the apparent difference in chromatin  
500 architecture in periportal hepatocytes. Cardiolipins and ubiquinones were altered strongly in  
501 aged cells. Together with measurements of mitochondrial respiratory capacity, the results  
502 indicated a change in efficiency of the electron transport chain and thus, ATP production,  
503 particularly in the periportal region of the liver. As periportal cells are exposed to high levels of  
504 oxygen due to their position close to the artery, they would usually rely on respiration. A  
505 decrease in vasculature<sup>22</sup> and blood flow<sup>59</sup> might therefore have stronger consequences on  
506 metabolic status in these hepatocytes than pericentral ones. A profound change in

507 mitochondrial metabolism might have direct consequences on chromatin. Indeed, several  
508 studies have already connected changes in mitochondrial metabolism with alterations in  
509 chromatin structure<sup>64–66</sup>. In support of the hypothesis that a decrease in vasculature leads to  
510 changes in liver oxygenation, the spatial transcriptomics highlighted hypoxic signalling  
511 changed with age, specifically in the central region of the lobule.

512 Spatial transcriptomics and the scATAC data both showed a clear signature of ageing in  
513 hepatocytes. On the other hand, we noted that the scRNA-seq provided by the Tabula Muris  
514 Senis consortium<sup>9</sup> was not able to cluster cells based on ageing. Even in hepatocytes, age  
515 explained only around 25% of the variance in the data. This low impact of ageing on clustering  
516 in scRNA-seq data can also be observed in other tissues in the Tabula Muris senis dataset  
517 and in a few studies that were published recently<sup>53,54</sup>. In addition, while cell type prediction of  
518 the scATAC data worked well using scRNA-seq, different ages were distributed fairly evenly  
519 across the young and old hepatocyte clusters. This indicated a global decoupling of chromatin  
520 and RNA, which we confirmed by correlating changes in accessibility and gene expression.

521 RNA-sequencing measures the steady-state level of mRNA, thus the technology would not be  
522 able to distinguish between changes in the synthesis and post-transcriptional regulation of  
523 mRNA<sup>67</sup>. Intriguingly, genes involved in post-transcriptional processing are among the top-  
524 dispersed genes, suggesting that this layer of gene expression regulation might be  
525 deregulated and more stochastic with age. One part of this layer would be mRNA splicing and  
526 indeed, there have been several reports over the last years that the process of splicing is  
527 strongly impacted by age and might itself contribute to ageing<sup>68–70</sup>. Totally unexplored as of  
528 now is the role of mRNA stability and storage with age. The decoupling of chromatin state and  
529 transcription is reminiscent of the decoupling of mRNA and protein levels with age<sup>71</sup>. Together,  
530 these data suggest that there is a progressive loss of cohesion between the different layers of  
531 gene expression that might contribute to the ageing process.



## 532 **MATERIALS AND METHODS**

### 533 **Mice**

534 C57BL/6N male young (3-4 months) and old (18-22months) old mice were bred and  
535 maintained in the mouse facility of Max Planck Institute for Biology of Ageing following ethical  
536 approval by the local authorities. The lights are controlled by timers and set a photoperiod of  
537 12 hours of light from 6 am until 6pm (with a 15min twilight period). The room temperature is  
538 22 +/- 2°C and the relative humidity 50 +/-5 %. All mice were fed with a standard diet ssniff M-  
539 Haltung, phyt.-arm (gamma irradiated).

### 540 **Immunohistochemistry**

541 Livers were excised post-mortem and fixed directly into 4% PFA for 24hrs at 4°C, washed  
542 twice with 1XPBS, embedded into paraffin blocks and cut into 5µm sections. For Oil-Red-O  
543 staining and spatial transcriptomics, freshly-dissected liver tissues were frozen in Tissue-Tek  
544 OCT compound (Sakura) and cut into 7µm and 10µm cryosections, respectively.

545 For IHC stainings, sections of paraffin-embedded samples were deparaffinised by immersion  
546 of the slides into the following buffers; 20 min in XyloI, 2 min. 100% EtOH, 2 min. 96% EtOH,  
547 75% EtOH and 1x PBS and washed three times with H<sub>2</sub>O for 5 min each. Endogenous  
548 peroxidase was quenched by immersion for 15 min in peroxidase blocking buffer (0.04 M  
549 NaCitrate pH 6.0, 0.121 M Na<sub>2</sub>HPO<sub>4</sub>, 0.03 M NaN<sub>3</sub>, 3% H<sub>2</sub>O<sub>2</sub>). After three washes with tap  
550 water, slides were subjected to heat-induced epitope retrieval with 10 mM NaCitrate, 0.05%  
551 Tween-20, pH 6.0, washed 5 min with 1X PBS, blocked 60 min with Blocking buffer + 160  
552 µl/ml AvidinD and incubated with primary antibodies diluted (1:200 Plin2) in blocking buffer +  
553 160 µl/ml Biotin overnight at 4°C. After three 5 min washes with PBST the samples were  
554 incubated with the secondary antibody 1:1000 diluted in blocking buffer for 1 h at room  
555 temperature, followed by three 5 min washes with PBST and incubation for 30 min with 1x  
556 PBS + 1:60 Avidin D + 1:60 Biotin. After three 5 min washes with PBST the samples were  
557 stained with 1 drop of DAB chromogen in 1 ml Substrate buffer, washed with 1X PBS and  
558 counterstained with Hematoxylin for 4 min, washed with tap water and distilled H<sub>2</sub>O and

559 dehydrated 1min in each buffer; 75% EtOH, 96% EtOH, 100% EtOH, Xylol and mounted with  
560 Entellan.

### 561 **H&E staining**

562 Following deparaffinization, slides with tissues washed with distilled and tapped water and  
563 stained with Hematoxylin for 5 min, followed by 5 washes in tapped water and staining with  
564 Eosin Y for 3 min, followed by 3 washes with tap water, dehydration and mounting in Entellan.

### 565 **Oil-red-O and Sirius Red staining**

566 Oil-Red-O and Sirius Red staining were used to visualize neutral lipids and collagen,  
567 respectively, and were performed according to standard procedures. Oil-Red-O staining was  
568 performed on 7- $\mu$ m-thick frozen liver sections that were fixed in 4% paraformaldehyde for 10  
569 min, followed by staining with 0.3% Oil-Red-O (Sigma) in isopropanol/water (60:40 vol/vol) for  
570 15min. Sirius red was performed on deparaffinized liver sections that were incubated for 1h at  
571 RT in Picro Sirius Red solution (ab150681, Abcam), followed by washes in acetic acid and  
572 alcohol solutions.

### 573 **RNAscope 2.5 HD Duplex**

574 Liver tissue was placed in a cassette, fixed in 4%paraformaldehyde (PFA) dissolved in  
575 phosphate-buffered saline (pH 7.4) for 24hrs at 4°, washed twice with 1XPBS, and embedded  
576 into paraffin blocks. 7 $\mu$ m thick sections were processed as described below. Detection of  
577 *Cyp2f2* (Cat No. 451851), *Alb* (Cat No. 4437691), *Cyp2e1* (Cat No. 402781-C2) and *Glul* (Cat  
578 No. 426231-C2) mRNA was performed using a chromogenic *in situ* hybridization technique  
579 (RNAscope™ 2.5 HD Duplex Assay, Advanced Cell Diagnostics) according to the  
580 manufacturer's instructions. RNAscope® 2.5 Duplex positive control probes PPIB-C1 and  
581 POLR2A-C2 (Cat No. 321651) were processed in parallel with the target probes. All incubation  
582 steps were performed using the ACD HybEz hybridization system (Cat No. 321462). Sections  
583 were mounted on SuperFrost Plus Gold slides (ThermoFisher), dried at RT, briefly rinsed in  
584 autoclaved Millipore water, air-dried, baked at 60°C for 1hrs and deparaffinized. Afterward,  
585 slides were treated with hydrogen peroxidase for 10 min. and submerged in Target Retrieval

586 (Cat No. 322000) at 98.5-99.5°C for 30 min, followed by two brief rinses in autoclaved Millipore  
587 water. A hydrophobic barrier was then created around the sections using an ImmEdge  
588 hydrophobic barrier pen (Cat No. 310018). Sections were incubated with Protease Plus (Cat  
589 No. 322330) for 30 min. The subsequent hybridization, amplification and detection steps were  
590 performed according to the manufacturer's instructions (2.5 HD Duplex Detection kit  
591 (Chromogenic), Cat No. 322500). Sections were counterstained with 50% Hematoxylin  
592 staining and mounted with VectaMount permanent mounting medium (Cat No. H-5000).

### 593 **Microscopy**

594 Immunohistochemistry, stainings and RNA scope images were taken using a Nikon Eclipse  
595 Ci microscope, with a colour camera.

### 596 **Liver perfusion and flow cytometry**

597 Livers were dissociated using the Miltenyi liver perfusion kit (beta-test version) following the  
598 manufacturer's instructions. The isolated hepatocytes were washed two times with staining  
599 buffer (1x PBS, 2mM EDTA, 0.5%BSA) and 1-7million hepatocytes were stained with 1:50  
600 FcX, 1:100 PE-anti-E-cadherin, 1:100 APC-anti-CD73 for 1hr at room temperature. Cells were  
601 washed two times with staining buffer, cells were filtered through a 100um strainer dead cells  
602 were excluded with DAPI. Cells were sorted using a BD FACSAria IIIU or Fusion Cytometer  
603 and 130um nozzle. The data were analysed using the BD FACSDiva and FlowJo softwares.

### 604 **Mitochondrial function measurement**

605 Mitochondrial function was evaluated by measuring the Oxygen Consumption Rate (OCR)  
606 with the Seahorse XFe96 Extracellular Flux Analyzer (Agilent). XFe96 cell culture plates were  
607 coated with Collagen-I (40 µg/ml) overnight at 4°C and then washed 2x with 1X DPBS before  
608 6,000 murine primary hepatocytes were seeded onto each well. Cells were cultured overnight  
609 in DMEM+GlutaMAX containing 10% FBS and 1x PenStrep under humidified conditions at  
610 37°C with 5% CO<sub>2</sub>. Cells were washed 2x with assay media composed of XF DMEM medium  
611 (pH 7.4) supplemented with glucose (10 mM), pyruvate (1 mM) and glutamine (2 mM). Cells  
612 were cultured in assay media and incubated for 1h at 37 °C in a non-CO<sub>2</sub> incubator. The  
613 Seahorse XF Mito Stress test was used to measure the OCR response after the sequential

614 injection of oligomycin (1.0  $\mu$ M), FCCP (1.0  $\mu$ M) and Rot/AA (0.5  $\mu$ M), according to the  
615 manufacturer's instructions. The data were normalised to cell numbers.

#### 616 **Genomic DNA extraction and qPCR for mitochondrial content**

617 Cells were trypsinised and genomic DNA was extracted using the NucleoSpin Tissue XS,  
618 Micro kit for DNA (REF 740901.50). Real time PCR was performed with primers specific to  
619 the cyto-b mitochondrial locus (fw: TCCGATATATACACGCAAACG, rv:  
620 ATAAGCCTCGTCCGACATGA) and results were normalised to total genomic DNA using  
621 primers for actin promoter locus (fw: TGCCCCATTCAATGTCTCGG, rv:  
622 ATCCACGTGACATCCACACC).

#### 623 **mRNA extraction and qPCR for Cyp2f2 and Glul expression**

624 To verify the relative abundance of expression of the respective markers of the sorted cells,  
625 CD73+ pericentral and E-cadherin+ periportal cells were isolated with flow cytometry (see  
626 methods above) from 3 individual (1 young and 2 old) mice and mRNA was extracted with the  
627 Dynabeads™ mRNA DIRECT™ Purification Kit (61011 Thermo Fisher Scientific). Reverse  
628 transcription was performed with the Maxima H Minus Reverse Transcriptase (EP 0751  
629 Thermo Fisher Scientific) and the cDNA was used for qPCR with primers for Cyp2f2 (fw:  
630 CTTCTGATACCCAAGGGCAC, rv: CTGAGGCGTCTTGAAGTGGT) and Glul (fw:  
631 CCACCGCTCTGAACACCTT, rv: TGGCTTGGACTTTCTCACCC). The results were  
632 normalised to Actin expression (fw: ACCGGTGCAGAGACATTGGAGTTCAAC, rv:  
633 GTCGACTCAGATCCCGAGGCAGAGTC).

#### 634 **Lipidomics**

##### 635 *Lipid extraction from liver tissue samples or liver duct organoids*

636 For the lipidomic analysis of liver tissue, 20 mg of snap-frozen tissue samples were  
637 homogenised using pre-cooled (liquid N<sub>2</sub>) metal balls (5 mm diameter) in a Qiagen Tissue  
638 Lyser for 1 min at 25 Hz. The pulverized tissue was resuspended in 1 ml pre-cooled (-20°C)  
639 extraction buffer (MTBE (methyl tert-butyl):MeOH 75:25 [v:v]), containing 0.2  $\mu$ L of EquiSplash  
640 Lipidomix as an internal standard. The re-suspended samples were homogenised for  
641 additional 5 min at 15 Hz in the TissueLyser.

642 After efficient tissue lysis, the samples were incubated for additional for 30 min on a  
643 thermomixer at 1500 rpm and at 4°C. To remove precipitated material from the samples, the  
644 Metal balls were removed and all samples were centrifuged for 10 min at 4°C and 21.000 x g.  
645 The supernatants was transferred to a new tube and 500 µl H<sub>2</sub>O:methanol 3:1 [v:v] were added  
646 before further incubating the extracts for additional 10 min at 1500 rpm and 15°C on a  
647 thermomixer. After this final incubation step the polar and lipid phases were separated in a 10  
648 min centrifugation step at 16.000 x g and 15°C. . The upper phase, MTBE-phase was  
649 transferred to a new tube and stored with the obtained insoluble pellets at -80°C for lipidomic  
650 analysis and protein extraction and quantification (BCA).

651 *Liquid Chromatography-High Resolution Mass Spectrometry-based (LC-HRMS) analysis of*  
652 *lipids*

653 The stored (-80°C) lipid extracts were dried in a SpeedVac concentrator before analysis and  
654 lipid pellets were resuspended in 200 µL of a UPLC-grade acetonitrile: isopropanol (70:30  
655 [v:v]) mixture. Samples were vortexed for 10 seconds and incubated for 10 min on a  
656 thermomixer at 4°C. Re-suspended samples were centrifuged for 5 min at 10.000 x g and 4°C,  
657 before transferring the cleared supernatant to 2 ml glass vials with 200 µl glass inserts. All  
658 samples were placed in an Acquity iClass UPLC sample manager at 6°C. The UPLC was  
659 connected to a Tribrid Orbitrap HRMS, equipped with a heated electrospray ionization (HESI)  
660 ion source (ID-X, Thermo Fischer Scientific).

661 Of each lipid sample, 1 µl was injected onto a 100 x 2.1 mm BEH C<sub>8</sub> UPLC column, packed  
662 with 1.7 µm particles. The flow rate of the UPLC was set to 400 µl/min and the buffer system  
663 consisted of buffer A (10 mM ammonium acetate, 0.1% acetic acid in UPLC-grade water) and  
664 buffer B (10 mM ammonium acetate, 0.1% acetic acid in UPLC-grade acetonitrile/isopropanol  
665 7:3 [v/v]). The UPLC gradient was as follows: 0-1 min 45% A, 1-4 min 45-25% A, 4-12 min 25-  
666 11% A, 12-15 min 11-1% A, 15-18 min 1% A, 20-18.1 min 1-45% A and 18.1-22 min re-  
667 equilibrating at 45% A. This leads to a total runtime of 22 min per sample.

668 The ID-X mass spectrometer was operating either for the first injection in positive ionization  
669 mode or for the second injection in negative ionization mode. In both cases, the analyzed

670 mass range was between m/z 160-1600. The resolution (R) was set to 120.000, leading to  
671 approximately 4 scans per second. The RF lens was set to 60%, while the AGC target was  
672 set to 250%. The maximal ion time was set to 100 ms and the HESI source was operating with  
673 a spray voltage of 3.5 kV in positive ionization mode, while 3.2 kV were applied in negative  
674 ionization mode. The ion tube transfer capillary temperature was 300°C, the sheath gas flow  
675 60 arbitrary units (AU), the auxiliary gas flow 20 AU and the sweep gas flow was set to 1 AU  
676 at 340°C.

677 All samples were measured in a randomized run-order and targeted data analysis was  
678 performed using the quan module of the TraceFinder 4.1 software (Thermo Fischer Scientific)  
679 in combination with a sample-specific in-house generated compound database. Peak areas  
680 of each peak were normalized to the internal standards from the extraction buffer and to either  
681 the fresh weight of the tissue or the protein concentration of the organoids.

## 682 **Spatial transcriptomics**

### 683 *Tissue and library preparation*

684 Liver specimen from 2 young and 2 old mice were cryopreserved and sections of 8 mm x 8  
685 mm x 10µm specimens. Libraries were prepared using the Visium Spatial Gene Expression  
686 solution from 10x Genomics using 30 minutes permeabilization time. Libraries were prepared  
687 according to the manufacturer's instruction and sequenced on an Illumina NovaSeq 6000.  
688 Sequencing data was initially quality controlled and pre-processed using the 10X Genomics  
689 CellRanger framework.

### 690 *Dimensionality reduction and individual analysis of datasets*

691 Young and old liver tissue slides were analyzed individually in R (V. 4.0.0) using the Seurat  
692 package (V. 4.0.4)<sup>41</sup>. Count matrices were normalized and scaled using the *SCTransform*  
693 function with standard parameters. Relative gene expression visualization of known hepatic  
694 pericentral and periportal marker genes on the spots of the tissue slides was performed with  
695 the *SpatialFeaturePlot* function.

### 696 *Dataset integration*

697 To assess batch effects between tissue slides, we merged the processed slides using the  
698 *merge* function and normalized and scaled without any further batch correction. Principal  
699 component analysis for Figure 2B was performed on the 2000 most variable features. The top  
700 50 genes associated with the first principal PCA component were visualized with the  
701 *VizDimLoadings* functions and intersected with the hepatocyte specific aging genes list from  
702 Ref. 14<sup>16</sup>. Integration of young and old liver tissue slides was performed in a stepwise manner  
703 as an integration of all datasets together would remove all potential differences between young  
704 and old datasets. First, the pre-processed young and old tissue slide datasets were integrated  
705 separately per age group using canonical correlation analysis described in <sup>15</sup>. Second, both  
706 combined datasets were merged and filtered for spots to have at least 1000 and at most 7000  
707 genes expressed. Subsequently, the joined count matrix was scaled and normalized together  
708 using the *NormalizeData* and *ScaleData* function.

#### 709 *Dimensionality reduction of integrated datasets*

710 We performed principal components analysis on the preprocessed data (*RunPCA* function).  
711 The first 10 principal components covered most of the data set's variance, and were  
712 considered a good approximation to the data as assessed by an elbowplot (*Elbowplot*  
713 function). The first 10 principal components, therefore, served as input to UMAP for further  
714 dimension reduction and visualization. Known canonical liver zonation marker genes were  
715 visualized with the *Featureplot* function.

#### 716 *Differential expression testing between young and old liver tissue slides*

717 Differential expression testing was done by using the *FindMarkers* function. Genes had to  
718 show at least an average log<sub>2</sub>-fold change of  $\pm 0.25$  to be considered for testing. Testing was  
719 performed using the *MAST* library by<sup>17</sup>. Bonferroni correction was applied for multiple testing  
720 adjustments of p-values. Go-term enrichment analysis for combinatorial categories was  
721 performed with the *enrichGO* function from the *clusterProfiler* library<sup>72</sup>. Results were  
722 summarised using REVIGO (<http://revigo.irb.hr/>)<sup>73</sup>. Heatmap visualization of genes from  
723 categories of interest was done with *pheatmap*<sup>74</sup>. Genes of GO-terms were extracted from the  
724 *org.Mm.eg.db* library<sup>75</sup>. Log<sub>2</sub> fold changes were calculated using the *FoldChange* function.

## 725 **Cytoscape**

726 The Cytoscape<sup>18</sup> apps ClueGo<sup>19</sup> and iRegulon<sup>23</sup> were used to calculate gene ontology  
727 networks and transcription factor predictions, respectively. All differentially expressed genes  
728 in old (Supplementary Table 4) were used as input for all analysis. ClueGo parameters were  
729 as follows: Biological Pathways were selected as ontologies and only pathways with  $pV \leq$   
730 0.001. GO Tree Interval was between 6 and 12. Cluster #1 was set at 2 minimum genes that  
731 represented 5% of genes, while the network connectivity was set at 0.4. iRegulon was run  
732 using Mus musculus MGI symbols using the following motif collection: 10k (9712PWMs).  
733 Putative regulatory region as well as motif ranking database were set as 20kb centered  
734 around TSS. NES scores for all TFs reported were  $> 4$ .

## 735 **Liver tissue preparation for scATAC-seq**

736 Liver nuclei (n=4) were prepared from frozen tissue specimens by crushing and dounce  
737 homogenising the tissue in 1 ml EZbuffer (SIGMA) (20 strokes with loose and a tight pestle,  
738 respectively) and spun 5 min at 300 g. The pellet was incubated on ice for 20 min in EZ-buffer  
739 supplemented with DNaseI NEB M0303S (4 units/ml) and 1X DNaseI buffer. Equal volume of  
740 EZ-buffer was added and samples were spun 5 min at 500 g and incubated again 10 min on  
741 ice in EZ-buffer supplemented with DNaseI NEB M0303S (8 units/ml) and 1X DNaseI buffer.  
742 Equal volume of EZ-buffer was added, and samples were spun 5min at 500g, resuspended in  
743 NSB (1087.5  $\mu$ l 1XPBS, 5.5 $\mu$ l 2% BSA, 1.5  $\mu$ l RNase Inhibitor) and filtered 3 times through a  
744 0.22  $\mu$ m strainer. For scATAC-seq, 100,000 nuclei were resuspended in 50  $\mu$ l tagmentation  
745 mix (10X Genomics)).

## 746 **scATAC-seq library preparation and sequencing**

747 scATAC-seq targeting 4000 cells per sample was performed using a beta version of Chromium  
748 Single Cell ATAC Library and Gel Bead kit (10x Genomics, 1000110) according to the  
749 manufacturer's instructions. Libraries were then pooled and loaded on an Illumina NovaSeq  
750 sequencer and sequenced to 18,904 median reads per cell for the young dataset and 21,139  
751 median reads per cell for the old dataset. Sequencing data was initially quality controlled and  
752 pre-processed using the 10X Genomics CellRanger framework.



## 753 **scATAC-seq analysis of young and old liver tissue**

754 Region accessibility count data were analyzed using the *cisTopic* library (V. 3.0<sup>39</sup>). Cells without  
755 any accessible regions were removed, leaving 4838 cells from young mice and 3361 cells  
756 from old mice. We included 117,290 regions into our analysis that were accessible in at least  
757 one cell. The latent Dirichlet allocation model was learned by the *runWarpLDAModels* function  
758 for topic numbers ranging from 2 to 15 topics. An appropriate number of topics for our data  
759 was selected as the topic number with the highest second derivative of the likelihood function.  
760 This was the case for 6 topics, and all downstream analyses use the LDA model learned for 6  
761 topics. Non-linear dimensionality reduction by UMAP was performed for visualization  
762 purposes only by applying the built-in *runUmap* function in *cisTopic* to the topic-distributions  
763 of all cells. Topic defining regions were derived via the *getRegionsScores*- and  
764 *binarizecisTopics*-function. GO-term and transcription factor motif analysis of the topic defining  
765 regions was done using *rGREAT* (V.1.22.0)<sup>76</sup> and *RcisTarget* (V.1.10)<sup>77</sup>. Transcription factor  
766 motifs shown in Fig 3F and Fig 6B were downloaded from the *JASPAR* database  
767 (<http://jaspar.genereg.net>).

768 To check the robustness of the *cisTopic* results, we performed a complementary analysis of  
769 the same data with *Signac* (V.1.0)<sup>40</sup>. The cell region count matrix was normalized using the  
770 term frequency-inverse document frequency (TF-IDF) normalization method from the *Signac*  
771 library (*RunTFIDF*). Initial linear dimensionality reduction was performed with singular value  
772 decomposition (*RunSVD*). As recoded in the *Signac* workflow, the first component of the  
773 singular value decomposition was excluded from all downstream analyses as it was highly  
774 correlated with the sequencing depth. Non-linear dimensionality reduction (UMAP) for Fig.  
775 S3A+B was generated via the *RunUMAP* function. The dimensions 2 to 35 were used as input  
776 for the algorithm.

### 777 *Differential accessibility testing*

778 We employed the *FindMarkers* function in the logistic regression framework of<sup>78</sup> to test for  
779 regions that were differentially accessible between young and old hepatocytes, respectively,  
780 between periportal and pericentral hepatocytes. We considered only regions detected in at

781 least 5% of the cells for testing. P-values were Bonferroni adjusted to account for multiple  
782 testing.

### 783 *Cell type annotation*

784 Our celltype annotation is based on the imputed gene activity of known liver cell marker genes  
785 from *CellAtlas*<sup>79</sup>. To calculate the imputed gene activities, fragments mapping to gene bodies  
786 or promoter regions of genes (Up to 2 kb upstream of a gene) were summed up using the  
787 *GeneActivity* function and subsequently normalized via the *NormalizeData* function from  
788 Signac. Periportal and pericentral cell populations were annotated based on the gene activity  
789 of *Cyp2e1* and *Cyp2f2* genes.

### 790 *Cell classification via canonical correlation analysis*

791 Tabula Muris Senis<sup>9</sup> droplet data were preprocessed as described in the respective section  
792 in the manuscript and filtered for cells for male individuals between 3 and 30 months of age.  
793 Transfer anchors were determined using the *FindTransferAnchors* function. Cell labels from  
794 the tabula Muris droplet dataset were used as provided in the metadata. Cell labels for the  
795 scATAC-seq dataset were predicted with the *TransferData* function. For details, see<sup>15</sup>.

### 796 *Construction of Cis-regulatory networks*

797 Co-accessibility scores for the interaction network of the *Cidea* locus were predicted with the  
798 *Cicero* library<sup>51</sup>. Reduced dimension coordinates of cells were based on the UMAP projection  
799 from *cisTopic*. Connections of co-accessible loci were inferred for young and old hepatocytes  
800 separately.

## 801 **Bulk RNA-seq data processing and analysis**

802 The TMS bulk RNA-seq data was analysed as described above by directly using the count  
803 matrix provided (<https://doi.org/10.6084/m9.figshare.8286230.v1>). We only used the data from  
804 male mice of the age 3 and 18 months.

## 805 **scRNA-seq data processing and analysis**

### 806 *Preliminary processing of TMS data*

807 We downloaded metadata and raw count tables from Tabula Muris Senis consortium for liver  
808 FACS and droplets methods. The TMS FACS and droplets data was filtered for genes

809 expressed in at least 3 cells, cells containing minimum 250 genes and 2500 counts for droplets  
810 while 500 genes and 5000 UMIs for the FACS data. The filtered count matrix was processed  
811 using Seurat (4.0.4)<sup>41</sup> with default parameters as per suggested pipeline using  
812 'NormalizeData', 'FindVariableFeatures', 'ScaleData', 'RunPCA', 'RunUMAP', 'FindNeighbors'  
813 and 'FindClusters' functions. The feature and PCA/UMAP plots generated in this manuscript  
814 are through Seurat plotting functions.

#### 815 *Linear model fit of the principal components*

816 We obtained the cell embeddings for each principal component from the processed  
817 Seurat objects. The input parameters are principal components, age and animal  
818 identity of the cells. The linear model for only hepatocytes was fitted using the 'lm'  
819 function in R (4.0.1) as  $\text{lm}(\text{PC}_n \sim \text{Age} + \text{Mouse.id})$ . The model estimates and  
820 predictions were extracted using the R package broom ([https://CRAN.R-](https://CRAN.R-project.org/package=broom)  
821 [project.org/package=broom](https://CRAN.R-project.org/package=broom)). The model fit with cell types was done in the same  
822 manner with "cell type" as an additional factor for cell identity. We tested the increase in  
823 noise for significance with 10,000 permutations and compared the actual variance in the old  
824 and young cells. This test gave p-values of 0.0002, 0.018 and 0 for the first 3 PCs respectively.

#### 825 *Differential expression and dispersion analysis*

826 The differential analysis was performed using the BASiCS package<sup>56,57</sup>. Posterior  
827 estimates were computed using a Markov chain Monte Carlo (MCMC) simulation with 20,000  
828 iterations and burn-in period 10000 with a regression model. We used BASiCS to detect  
829 differentially expressed and differentially variable genes between old and young hepatocytes.  
830 For changes in mean expression between ages, we use the 'BASiCS\_TestDE' function with  
831 EFDR cutoff 0.1. Only genes with no change in mean expression were considered for  
832 interpreting changes in variability. We filtered genes with the detection rate of 0.5 in each  
833 age and mean overall expression of 5.

834 Obtained sets of genes from each differentially expressed and variability were further  
835 subjected to Gene Ontology Biological Processes enrichment analysis using the 'enrichGO'

836 function from clusterProfiler (3.14.3) R package<sup>72</sup>. To remove the redundancy of enriched  
837 terms, we used the ‘simplify’ function from clusterProfiler with the default parameters. The  
838 pathway enrichment was performed using the ‘enrichPathway’ function from the ReactomePA  
839 R package (1.36.0)<sup>80</sup>.

840

#### 841 **DATA AVAILABILITY**

842 All sequencing data generated for this study is available at ENA under curation. H3K27ac for  
843 young and old mice was downloaded from  
844 <https://www.ncbi.nlm.nih.gov/bioproject/?term=PRJNA281127><sup>81</sup>. Tabula Muris senis single  
845 cell data is available at: <https://www.ncbi.nlm.nih.gov/geo/query/acc.cgi?acc=GSE149590><sup>9</sup>.  
846 Tabula Muris senis bulk RNA-seq data is available at:  
847 <https://www.ncbi.nlm.nih.gov/geo/query/acc.cgi?acc=GSE132040><sup>9</sup>.

848

#### 849 **AUTHOR CONTRIBUTIONS**

850 Conceptualisation: C.N., S.P., N.K., A.T. and P.T.; Methodology: C.N., S.P., N.K., E.K., T.S.,  
851 J.A.; Investigation: C.N., S.P., N.K., T.S., F.S., P.G., M.B., A.J.V., T.W. and E.K.; Formal  
852 Analysis: C.N., S.P., N.K. and P.G.; Supervision: A.T. and P.T.; Funding Acquisition: A.T. and  
853 P.T.; Project Administration: C.N., A.T., P.T.; Writing of Manuscript: P.T., with input from all  
854 authors

855

#### 856 **CONFLICT OF INTEREST**

857 The authors do not declare any conflict of interest

858

#### 859 **ACKNOWLEDGMENTS**

860 We would like to thank all members of the Tessarz and Tresch labs for continuous discussion.  
861 We are grateful to A. Schaefer and A. Pouikli for critical reading of the manuscript. We are  
862 indebted to the following core facilities of the MPI for Biology of Ageing for superb technical

863 assistance: FACS and Imaging for help with FACS analysis, histology and microscopy,  
864 Metabolomics for lipidomic analysis and Comparative Biology for housing mice. Electron  
865 microscopy was performed at the Imaging Core Facility of CECAD, University of Cologne.  
866 scATAC-seq and spatial transcriptomics were performed at the Cologne Center for Genomics,  
867 University of Cologne, Germany. All other libraries were sequenced at the Sequencing Core  
868 Facility of the MPI for Molecular Genetics, Berlin, Germany. This work was funded by the Max  
869 Planck Society (to P.T. and T.W.), the Deutsche Forschungsgemeinschaft (DFG, German  
870 Research Foundation; project no. 415274764 (V.K. and F.S.), the BOOST program of the Max  
871 Planck Society (to C.N.) and the Deutsche Forschungsgemeinschaft (DFG, under Germany's  
872 Excellence Strategy – EXC 2030 – 390661388) (to P.T.).

873

## 874 REFERENCES

- 875 1. López-Otín, C., Blasco, M. A., Partridge, L., Serrano, M. & Kroemer, G. The hallmarks  
876 of aging. *Cell* **153**, 1194–1217 (2013).
- 877 2. Ferrucci, L. & Kuchel, G. A. Heterogeneity of Aging: Individual Risk Factors,  
878 Mechanisms, Patient Priorities, and Outcomes. *J. Am. Geriatr. Soc.* **69**, 610–612  
879 (2021).
- 880 3. Bahar, R. *et al.* Increased cell-to-cell variation in gene expression in ageing mouse  
881 heart. *Nature* **441**, 1011–1014 (2006).
- 882 4. Somel, M., Khaitovich, P., Bahn, S., Pääbo, S. & Lachmann, M. Gene expression  
883 becomes heterogeneous with age. *Curr. Biol.* **16**, R359–R360 (2006).
- 884 5. Işıldak, U., Somel, M., Thornton, J. M. & Dönertaş, H. M. Temporal changes in the gene  
885 expression heterogeneity during brain development and aging. *Sci. Rep.* **10**, 4080  
886 (2020).
- 887 6. He, X., Memczak, S., Qu, J., Belmonte, J. C. I. & Liu, G.-H. Single-cell omics in ageing:  
888 a young and growing field. *Nat Metab* **2**, 293–302 (2020).
- 889 7. Ben-Moshe, S. & Itzkovitz, S. Spatial heterogeneity in the mammalian liver. *Nat. Rev.*

- 890 *Gastroenterol. Hepatol.* **16**, 395–410 (2019).
- 891 8. Jungermann, K. & Kietzmann, T. Zonation of parenchymal and nonparenchymal  
892 metabolism in liver. *Annu. Rev. Nutr.* **16**, 179–203 (1996).
- 893 9. Schaum, N. *et al.* Ageing hallmarks exhibit organ-specific temporal signatures. *Nature*  
894 **583**, 596–602 (2020).
- 895 10. Petr, M. A. *et al.* A cross-sectional study of functional and metabolic changes during  
896 aging through the lifespan in male mice. *Elife* **10**, (2021).
- 897 11. Chung, K. W. Advances in Understanding of the Role of Lipid Metabolism in Aging.  
898 *Cells* **10**, (2021).
- 899 12. Schleicher, J., Dahmen, U., Guthke, R. & Schuster, S. Zonation of hepatic fat  
900 accumulation: insights from mathematical modelling of nutrient gradients and fatty acid  
901 uptake. *J. R. Soc. Interface* **14**, (2017).
- 902 13. Halpern, K. B. *et al.* Single-cell spatial reconstruction reveals global division of labour in  
903 the mammalian liver. *Nature* **542**, 352–356 (2017).
- 904 14. McIntosh, A. L. *et al.* Direct interaction of Plin2 with lipids on the surface of lipid droplets:  
905 a live cell FRET analysis. *Am. J. Physiol. Cell Physiol.* **303**, C728-42 (2012).
- 906 15. Stuart, T. *et al.* Comprehensive Integration of Single-Cell Data. *Cell* **177**, 1888-1902.e21  
907 (2019).
- 908 16. Zhang, M. J., Pisco, A. O., Darmanis, S. & Zou, J. Mouse aging cell atlas analysis  
909 reveals global and cell type-specific aging signatures. *Elife* **10**, e62293 (2021).
- 910 17. Finak, G. *et al.* MAST: a flexible statistical framework for assessing transcriptional  
911 changes and characterizing heterogeneity in single-cell RNA sequencing data. *Genome*  
912 *Biol.* **16**, 278 (2015).
- 913 18. Shannon, P. *et al.* Cytoscape: a software environment for integrated models of  
914 biomolecular interaction networks. *Genome Res.* **13**, 2498–2504 (2003).
- 915 19. Bindea, G. *et al.* ClueGO: a Cytoscape plug-in to decipher functionally grouped gene  
916 ontology and pathway annotation networks. *Bioinformatics* **25**, 1091–1093 (2009).
- 917 20. Hunte, C., Palsdottir, H. & Trumpower, B. L. Protonmotive pathways and mechanisms in

- 918 the cytochrome bc1 complex. *FEBS Lett.* **545**, 39–46 (2003).
- 919 21. Kadenbach, B. & Hüttemann, M. The subunit composition and function of mammalian  
920 cytochrome c oxidase. *Mitochondrion* **24**, 64–76 (2015).
- 921 22. Chen, J. *et al.* High-resolution 3D imaging uncovers organ-specific vascular control of  
922 tissue aging. *Sci Adv* **7**, (2021).
- 923 23. Janky, R. *et al.* iRegulon: from a gene list to a gene regulatory network using large motif  
924 and track collections. *PLoS Comput. Biol.* **10**, e1003731 (2014).
- 925 24. Pontoglio, M. Hepatocyte nuclear factor 1, a transcription factor at the crossroads of  
926 glucose homeostasis. *J. Am. Soc. Nephrol.* **11 Suppl 16**, S140-3 (2000).
- 927 25. Bonzo, J. A., Ferry, C. H., Matsubara, T., Kim, J.-H. & Gonzalez, F. J. Suppression of  
928 hepatocyte proliferation by hepatocyte nuclear factor 4 $\alpha$  in adult mice. *J. Biol. Chem.*  
929 **287**, 7345–7356 (2012).
- 930 26. Wangenstein, K. J., Zhang, S., Greenbaum, L. E. & Kaestner, K. H. A genetic screen  
931 reveals Foxa3 and TNFR1 as key regulators of liver repopulation. *Genes Dev.* **29**, 904–  
932 909 (2015).
- 933 27. Matsusue, K. *et al.* Hepatic CCAAT/enhancer binding protein alpha mediates induction  
934 of lipogenesis and regulation of glucose homeostasis in leptin-deficient mice. *Mol.*  
935 *Endocrinol.* **18**, 2751–2764 (2004).
- 936 28. Veum, V. L. *et al.* The nuclear receptors NUR77, NURR1 and NOR1 in obesity and  
937 during fat loss. *Int. J. Obes. (Lond)* **36**, 1195–1202 (2012).
- 938 29. Lin, W.-J. *et al.* LipidSig: a web-based tool for lipidomic data analysis. *Nucleic Acids*  
939 *Res.* **49**, W336–W345 (2021).
- 940 30. Tan, S. T., Ramesh, T., Toh, X. R. & Nguyen, L. N. Emerging roles of lysophospholipids  
941 in health and disease. *Prog. Lipid Res.* **80**, 101068 (2020).
- 942 31. Breslow, D. K. & Weissman, J. S. Membranes in balance: mechanisms of sphingolipid  
943 homeostasis. *Mol. Cell* **40**, 267–279 (2010).
- 944 32. Gómez-Fernández, J. C. & Corbalán-García, S. Diacylglycerols, multivalent membrane  
945 modulators. *Chem. Phys. Lipids* **148**, 1–25 (2007).

- 946 33. Erion, D. M. & Shulman, G. I. Diacylglycerol-mediated insulin resistance. *Nat. Med.* **16**,  
947 400–402 (2010).
- 948 34. Li, Z. *et al.* Reducing plasma membrane sphingomyelin increases insulin sensitivity.  
949 *Mol. Cell. Biol.* **31**, 4205–4218 (2011).
- 950 35. Paradies, G., Paradies, V., Ruggiero, F. M. & Petrosillo, G. Role of Cardiolipin in  
951 Mitochondrial Function and Dynamics in Health and Disease: Molecular and  
952 Pharmacological Aspects. *Cells* **8**, (2019).
- 953 36. Ben-Moshe, S. *et al.* Spatial sorting enables comprehensive characterization of liver  
954 zonation. *Nat Metab* **1**, 899–911 (2019).
- 955 37. Marchetti, P., Fovez, Q., Germain, N., Khamari, R. & Kluza, J. Mitochondrial spare  
956 respiratory capacity: Mechanisms, regulation, and significance in non-transformed and  
957 cancer cells. *FASEB J.* **34**, 13106–13124 (2020).
- 958 38. Hill, B. G. *et al.* Integration of cellular bioenergetics with mitochondrial quality control  
959 and autophagy. *Biol. Chem.* **393**, 1485–1512 (2012).
- 960 39. Bravo González-Blas, C. *et al.* cisTopic: cis-regulatory topic modeling on single-cell  
961 ATAC-seq data. *Nat. Methods* **16**, 397–400 (2019).
- 962 40. Stuart, T., Srivastava, A., Lareau, C. & Satija, R. Multimodal single-cell chromatin  
963 analysis with Signac. *bioRxiv* 2020.11.09.373613 (2020)  
964 doi:10.1101/2020.11.09.373613.
- 965 41. Hao, Y. *et al.* Integrated analysis of multimodal single-cell data. *Cell* **184**, 3573-  
966 3587.e29 (2021).
- 967 42. Aizarani, N. *et al.* A human liver cell atlas reveals heterogeneity and epithelial  
968 progenitors. *Nature* (2019) doi:10.1038/s41586-019-1373-2.
- 969 43. Sato, S. *et al.* Circadian Reprogramming in the Liver Identifies Metabolic Pathways of  
970 Aging. *Cell* **170**, 664-677.e11 (2017).
- 971 44. Fanti, M., Singh, S., Ledda-Columbano, G. M., Columbano, A. & Monga, S. P. Tri-  
972 iodothyronine induces hepatocyte proliferation by protein kinase A-dependent  $\beta$ -catenin  
973 activation in rodents. *Hepatology* **59**, 2309–2320 (2014).



- 974 45. Pouikli, A. *et al.* Chromatin remodeling due to degradation of citrate carrier impairs  
975 osteogenesis of aged mesenchymal stem cells. *Nature Aging* vol. 1 810–825 (2021).
- 976 46. Reynolds, J. C., Bwiza, C. P. & Lee, C. Mitonuclear genomics and aging. *Hum. Genet.*  
977 **139**, 381–399 (2020).
- 978 47. Xu, L., Zhou, L. & Li, P. CIDE proteins and lipid metabolism. *Arterioscler. Thromb. Vasc.*  
979 *Biol.* **32**, 1094–1098 (2012).
- 980 48. Xu, W. *et al.* Differential Roles of Cell Death-inducing DNA Fragmentation Factor- $\alpha$ -like  
981 Effector (CIDE) Proteins in Promoting Lipid Droplet Fusion and Growth in  
982 Subpopulations of Hepatocytes\* $\diamond$ . *J. Biol. Chem.* **291**, 4282–4293 (2016).
- 983 49. Barneda, D. *et al.* The brown adipocyte protein CIDEA promotes lipid droplet fusion via  
984 a phosphatidic acid-binding amphipathic helix. *Elife* **4**, e07485 (2015).
- 985 50. Matsusue, K. *et al.* Hepatic steatosis in leptin-deficient mice is promoted by the  
986 PPAR $\gamma$  target gene *Fsp27*. *Cell Metab.* **7**, 302–311 (2008).
- 987 51. Pliner, H. A. *et al.* Cicero Predicts cis-Regulatory DNA Interactions from Single-Cell  
988 Chromatin Accessibility Data. *Mol. Cell* **71**, 858-871.e8 (2018).
- 989 52. Muto, Y. *et al.* Single cell transcriptional and chromatin accessibility profiling redefine  
990 cellular heterogeneity in the adult human kidney. *Nat. Commun.* **12**, 2190 (2021).
- 991 53. Dulken, B. W. *et al.* Single-cell analysis reveals T cell infiltration in old neurogenic  
992 niches. *Nature* **571**, 205–210 (2019).
- 993 54. Yi, W., Lu, Y., Zhong, S., Zhang, M. & Sun, L. A single-cell transcriptome atlas of the  
994 aging human and macaque retina. *National Science* (2021).
- 995 55. Martinez-Jimenez, C. P. *et al.* Aging increases cell-to-cell transcriptional variability upon  
996 immune stimulation. *Science* **355**, 1433–1436 (2017).
- 997 56. Vallejos, C. A., Richardson, S. & Marioni, J. C. Beyond comparisons of means:  
998 understanding changes in gene expression at the single-cell level. *Genome Biol.* **17**, 70  
999 (2016).
- 1000 57. Eling, N., Richard, A. C., Richardson, S., Marioni, J. C. & Vallejos, C. A. Correcting the  
1001 Mean-Variance Dependency for Differential Variability Testing Using Single-Cell RNA

- 1002 Sequencing Data. *Cell Syst* **7**, 284–294.e12 (2018).
- 1003 58. Kusumbe, A. P. *et al.* Age-dependent modulation of vascular niches for haematopoietic  
1004 stem cells. *Nature* **532**, 380–384 (2016).
- 1005 59. Wynne, H. A. *et al.* The effect of age upon liver volume and apparent liver blood flow in  
1006 healthy man. *Hepatology* **9**, 297–301 (1989).
- 1007 60. Gong, J. *et al.* Fsp27 promotes lipid droplet growth by lipid exchange and transfer at  
1008 lipid droplet contact sites. *J. Cell Biol.* **195**, 953–963 (2011).
- 1009 61. Zhou, L. *et al.* Cidea promotes hepatic steatosis by sensing dietary fatty acids.  
1010 *Hepatology* **56**, 95–107 (2012).
- 1011 62. Sans, A. *et al.* The Differential Expression of Cide Family Members is Associated with  
1012 Nafld Progression from Steatosis to Steatohepatitis. *Sci. Rep.* **9**, 1–12 (2019).
- 1013 63. Nassir, F., Rector, R. S., Hammoud, G. M. & Ibdah, J. A. Pathogenesis and Prevention  
1014 of Hepatic Steatosis. *Gastroenterol. Hepatol.* **11**, 167–175 (2015).
- 1015 64. Martinez-Pastor, B., Cosentino, C. & Mostoslavsky, R. A tale of metabolites: the cross-  
1016 talk between chromatin and energy metabolism. *Cancer Discov.* **3**, 497–501 (2013).
- 1017 65. Dai, Z., Ramesh, V. & Locasale, J. W. The evolving metabolic landscape of chromatin  
1018 biology and epigenetics. *Nat. Rev. Genet.* **21**, 737–753 (2020).
- 1019 66. Wiese, M. & Bannister, A. J. Two genomes, one cell: Mitochondrial-nuclear coordination  
1020 via epigenetic pathways. *Molecular Metabolism* **38**, 100942 (2020).
- 1021 67. Nikopoulou, C., Parekh, S. & Tessarz, P. Ageing and sources of transcriptional  
1022 heterogeneity. *Biol. Chem.* (2019) doi:10.1515/hsz-2018-0449.
- 1023 68. Lee, B. P. *et al.* Changes in the expression of splicing factor transcripts and variations in  
1024 alternative splicing are associated with lifespan in mice and humans. *Aging Cell* **15**,  
1025 903–913 (2016).
- 1026 69. Heintz, C. *et al.* Splicing factor 1 modulates dietary restriction and TORC1 pathway  
1027 longevity in *C. elegans*. *Nature* **541**, 102–106 (2017).
- 1028 70. Lai, R. W. *et al.* Multi-level remodeling of transcriptional landscapes in aging and  
1029 longevity. *BMB Rep.* **52**, 86–108 (2019).

- 1030 71. Kelmer Sacramento, E. *et al.* Reduced proteasome activity in the aging brain results in  
1031 ribosome stoichiometry loss and aggregation. *Mol. Syst. Biol.* **16**, e9596 (2020).
- 1032 72. Yu, G., Wang, L.-G., Han, Y. & He, Q.-Y. clusterProfiler: an R Package for Comparing  
1033 Biological Themes Among Gene Clusters. *OMICS: A Journal of Integrative Biology* vol.  
1034 16 284–287 (2012).
- 1035 73. Supek, F., Bošnjak, M., Škunca, N. & Šmuc, T. REVIGO summarizes and visualizes  
1036 long lists of gene ontology terms. *PLoS One* **6**, e21800 (2011).
- 1037 74. Kolde, R. Pheatmap: pretty heatmaps. *R package version* (2012).
- 1038 75. Carlson, M., Falcon, S., Pages, H. & Li, N. org. Mm. eg. db: Genome wide annotation  
1039 for Mouse. (2015).
- 1040 76. Gu, Z. *rGREAT*. (Bioconductor, 2017). doi:10.18129/B9.BIOC.RGREAT.
- 1041 77. Aibar, S. *et al.* SCENIC: Single-cell regulatory network inference and clustering. *Nat.*  
1042 *Methods* **14**, 1083–1086 (2017).
- 1043 78. Ntranos, V., Yi, L., Melsted, P. & Pachter, L. A discriminative learning approach to  
1044 differential expression analysis for single-cell RNA-seq. *Nature Methods* vol. 16 163–  
1045 166 (2019).
- 1046 79. Zhang, X. *et al.* CellMarker: A manually curated resource of cell markers in human and  
1047 mouse. *Nucleic Acids Res.* **47**, D721–D728 (2019).
- 1048 80. Yu, G. & He, Q.-Y. ReactomePA: an R/Bioconductor package for reactome pathway  
1049 analysis and visualization. *Mol. Biosyst.* **12**, 477–479 (2016).
- 1050 81. Benayoun, B. A. *et al.* Remodeling of epigenome and transcriptome landscapes with  
1051 aging in mice reveals widespread induction of inflammatory responses. *Genome Res.*  
1052 **29**, 697–709 (2019).
- 1053

1054 **SUPPLEMENTARY FIGURES**

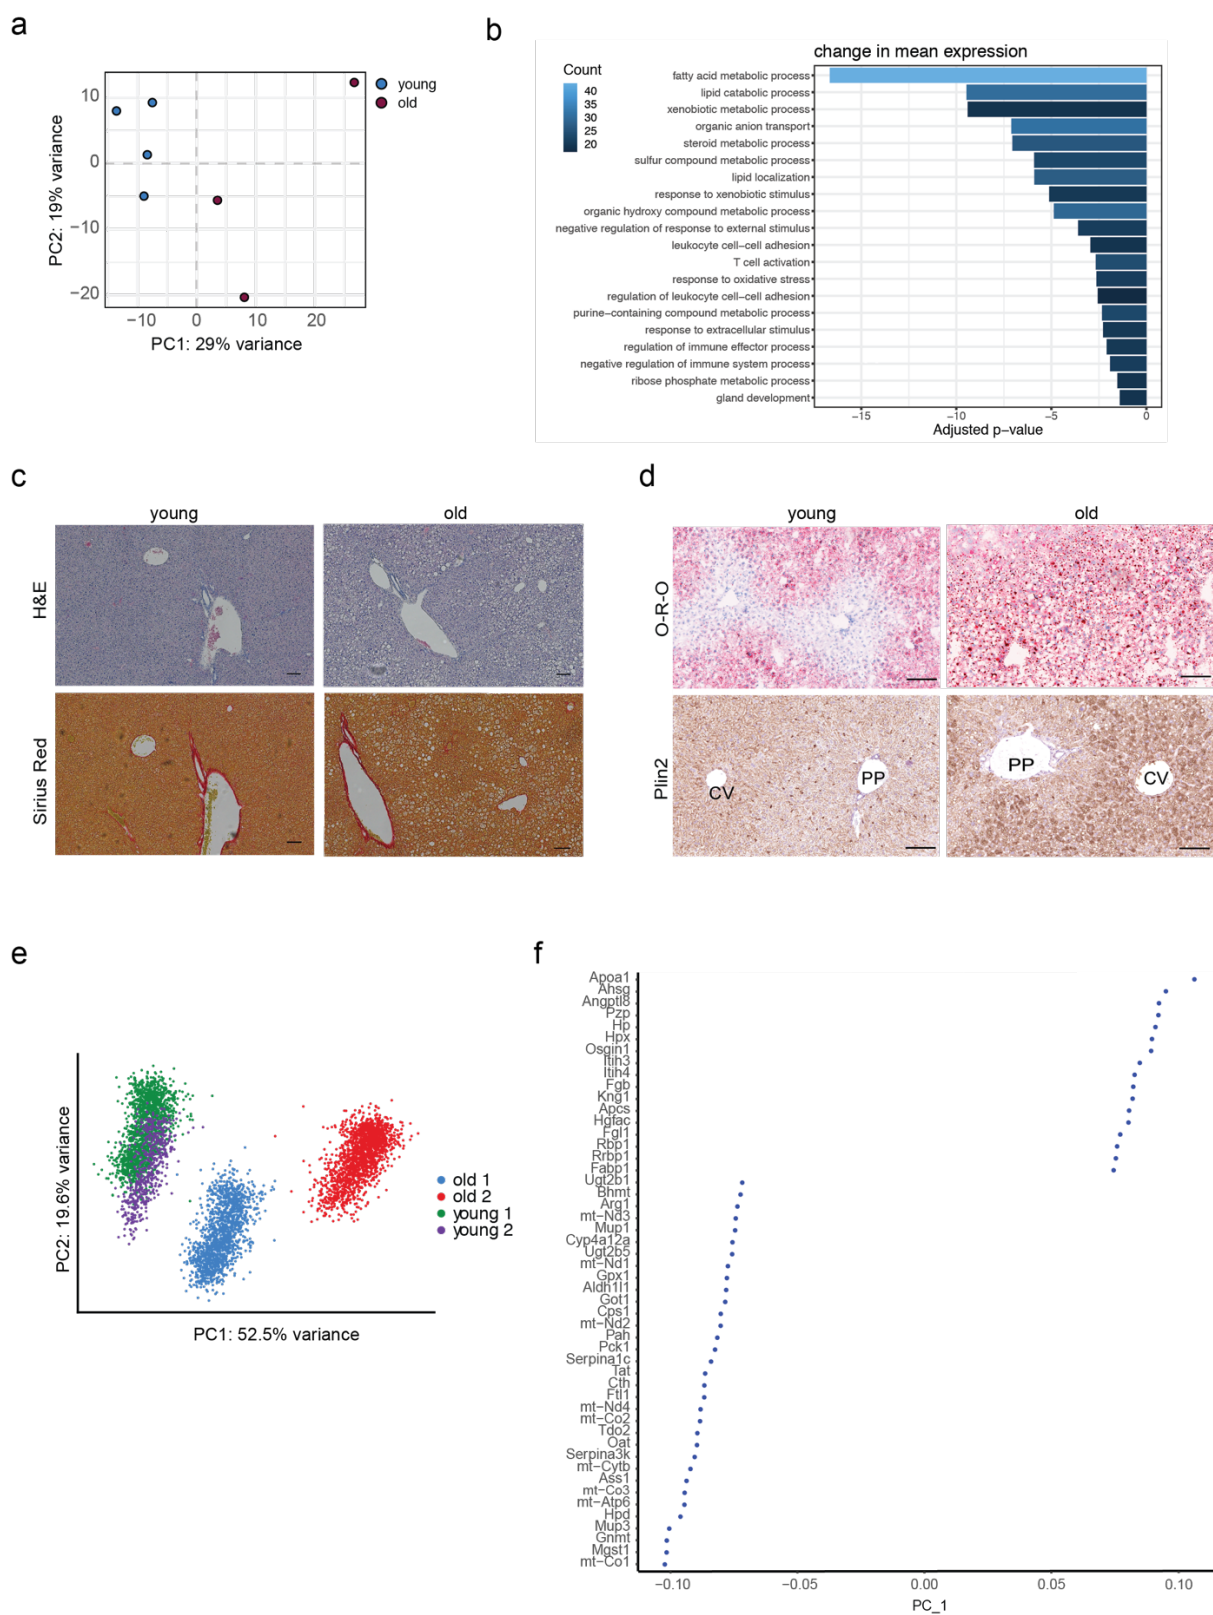

1055

1056 **Figure S1:** a) PCA projection of bulk RNAseq data <sup>9</sup> derived from young and old mouse livers. b)

1057 Differentially enriched pathways in the aged liver tissue derived from A (Supplementary Table 1). The

1058 colour scale represents the number of genes in each term. c) Representative images from H&E (upper  
1059 panel) and Sirius Red (lower panel) stainings on liver sections from a young and an old mouse. Scale  
1060 bar=100 $\mu$ m. d) Representative images of PP (periportal) and CV (central vein areas) of Oil-red-O (O-  
1061 R-O, upper panel) and Plin2 immunostainings (lower panel) on liver sections from young and old mice.  
1062 Scale bar = 100  $\mu$ m. e) PCA plot of the spatial data after integration of the four datasets using canonical  
1063 correlation analysis. Different colours represent the different samples. f) PC plot showing the top 50  
1064 genes that separate the ageing groups in Figure S1e.  
1065

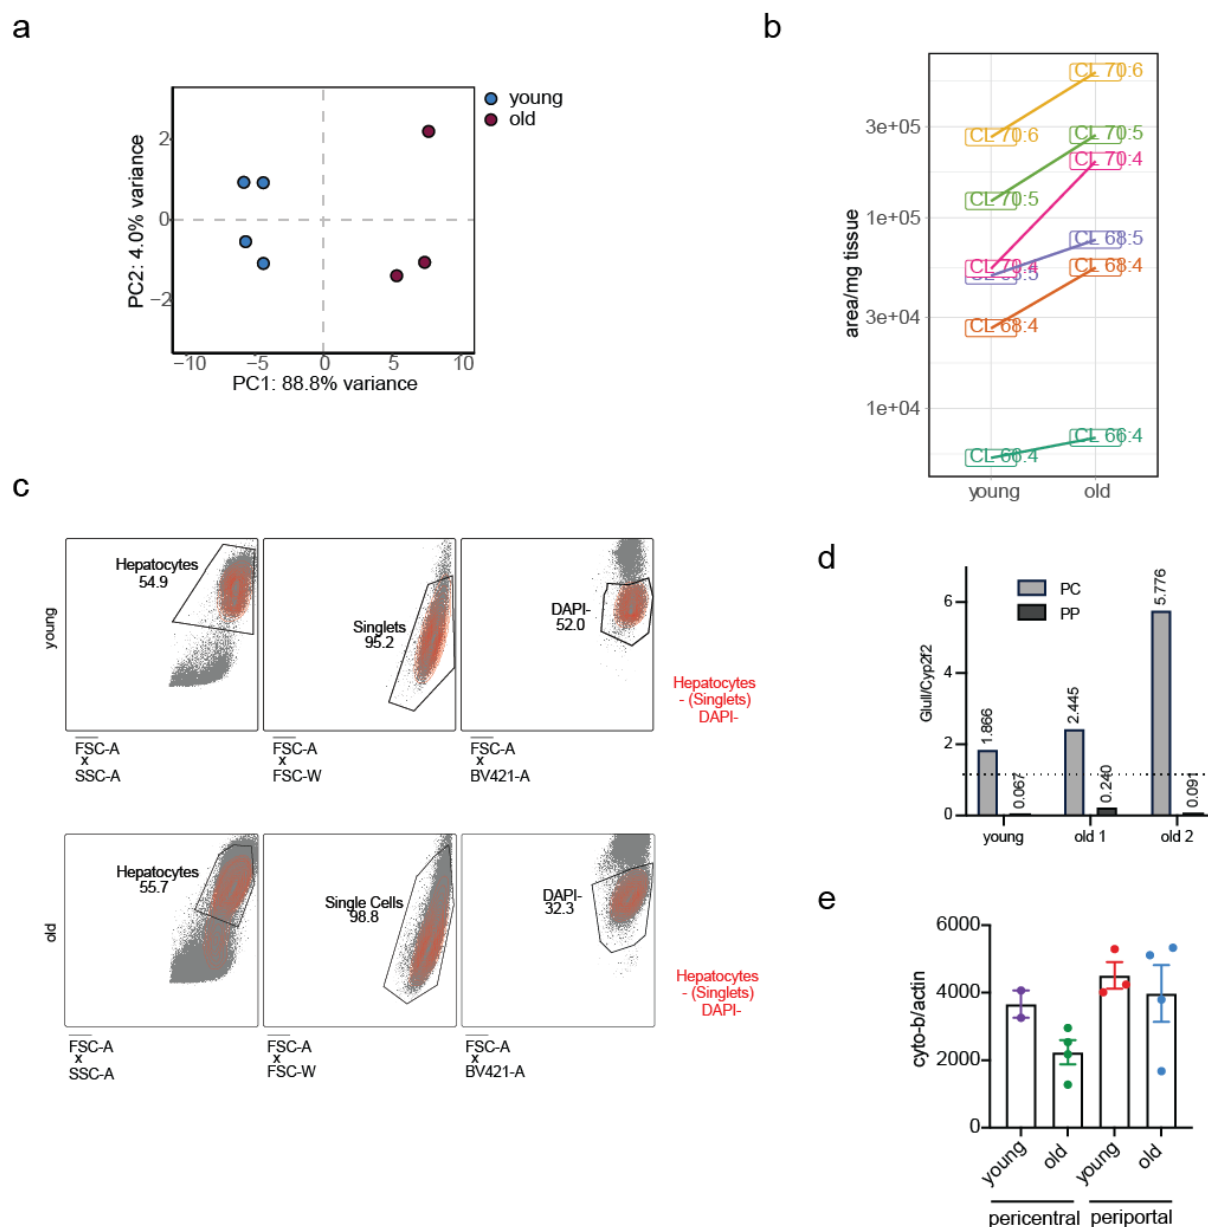

1066

1067 **Figure S2:** a) PCA of lipidomic data coloured by age. b) Changes of individual cardiolipins between

1068 young and old livers. c) Gating strategy for isolation of pericentral and periportal hepatocytes. d) qRT-

1069 PCR to validate the enrichment for pericentral and periportal hepatocytes based on expression ratios

1070 of Glul and Cyp2f2 levels. Shown are individual replicates for young and old mice (as indicated). e)

1071 Mitochondrial content was measured using primers against genomic copies of cyto-b and b-actin.

1072 Individual values are given as dots. Error bars represent the SEM.

1073

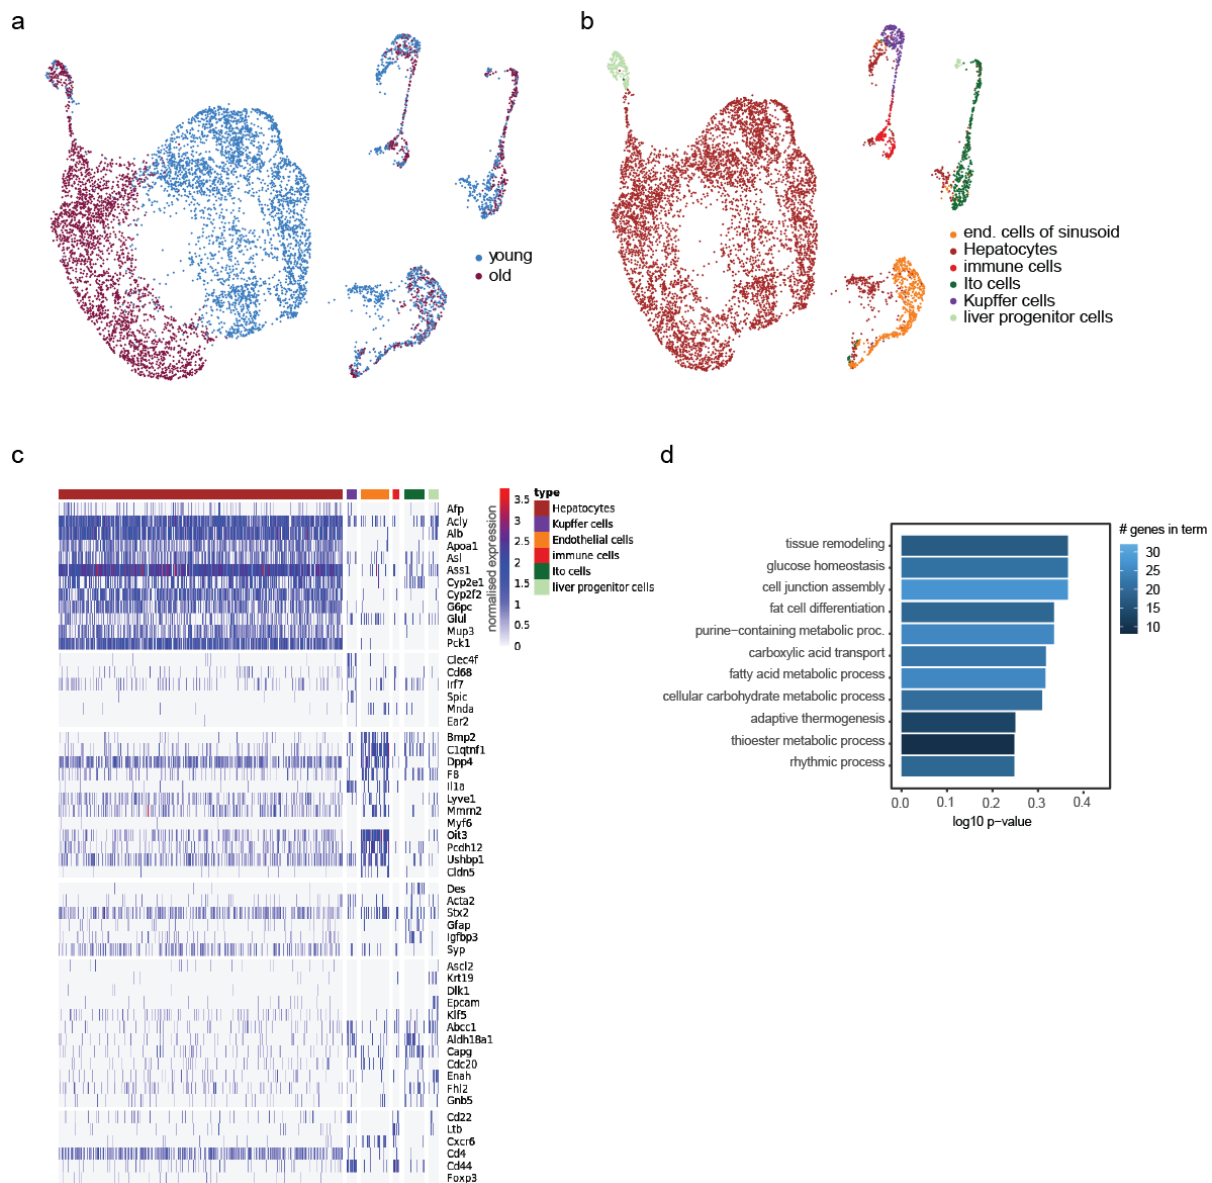

1074

1075 **Figure S3:** a) UMAP projection of scATAC-seq nuclei from young and old livers. Colour-coded are the  
 1076 different age groups identified using Signac. b) Same as in a). Colour coded are the different cell types,  
 1077 assigned by using marker genes from CellMarker. c) Heatmap showing the accessibility of marker  
 1078 genes in each assigned cell type of the scATAC-seq data. d) GO enrichment for genes found in  
 1079 differentially accessible loci in young vs. old hepatocytes (TSS $\pm$  3kb).

1080

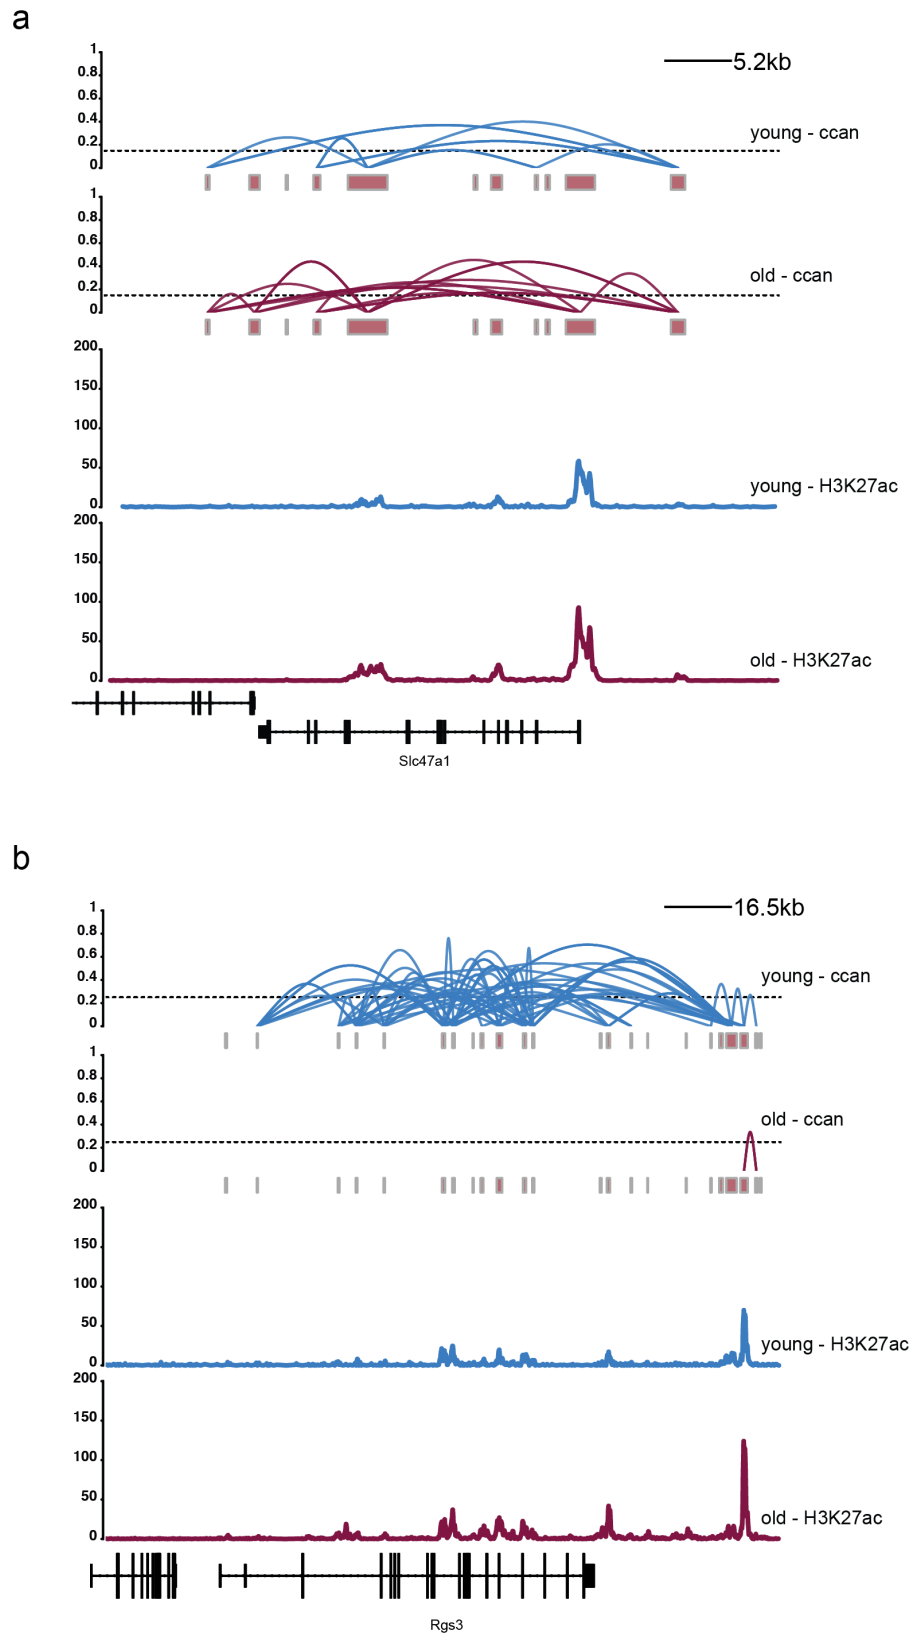

1081

1082 **Figure S4:** Ccan plots of loci identified to show increased (Slc47a1, a) and decreased (Rgs3, b) co-

1083 accessibility. H3K27ac tracks are shown to indicate potential enhancers.

1084



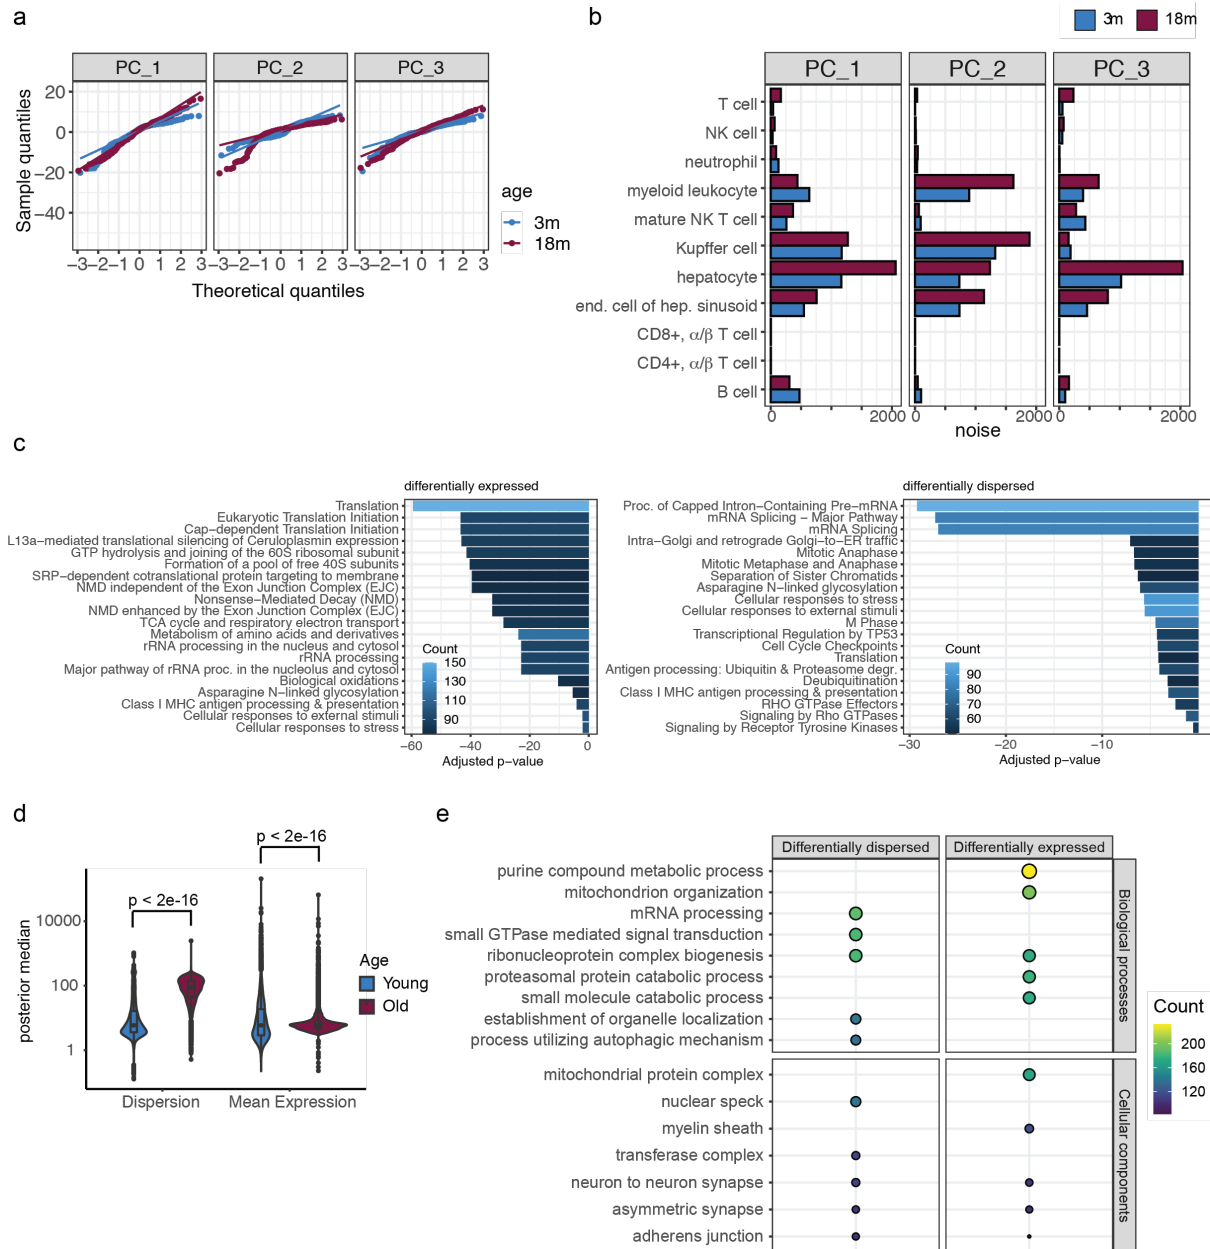

1085

1086 **Figure S5:** a) QQ-plot of the residuals from a linear model fit for the first 3 PCs with age. b) A barplot

1087 of the sum of residual squares (noise) for each linear model fit to the first 5 PCs with age and cell type

1088 coloured by age. c) The pathways enrichment for the differentially expressed (left) and differentially

1089 over-dispersed (right) genes. d) TMS FACS female data from age 3 and 18 was used to estimate mean

1090 expression ( $\mu$ ) and over-dispersion ( $\delta$ ) parameters using a regression model from BASiCS

1091 coloured by age. e) Top biological processes (upper panel) and cellular components (lower panel)

1092 enriched in the differentially dispersed (left) and differentially expressed (right) genes in the TMS FACS

1093 female dataset.

1094

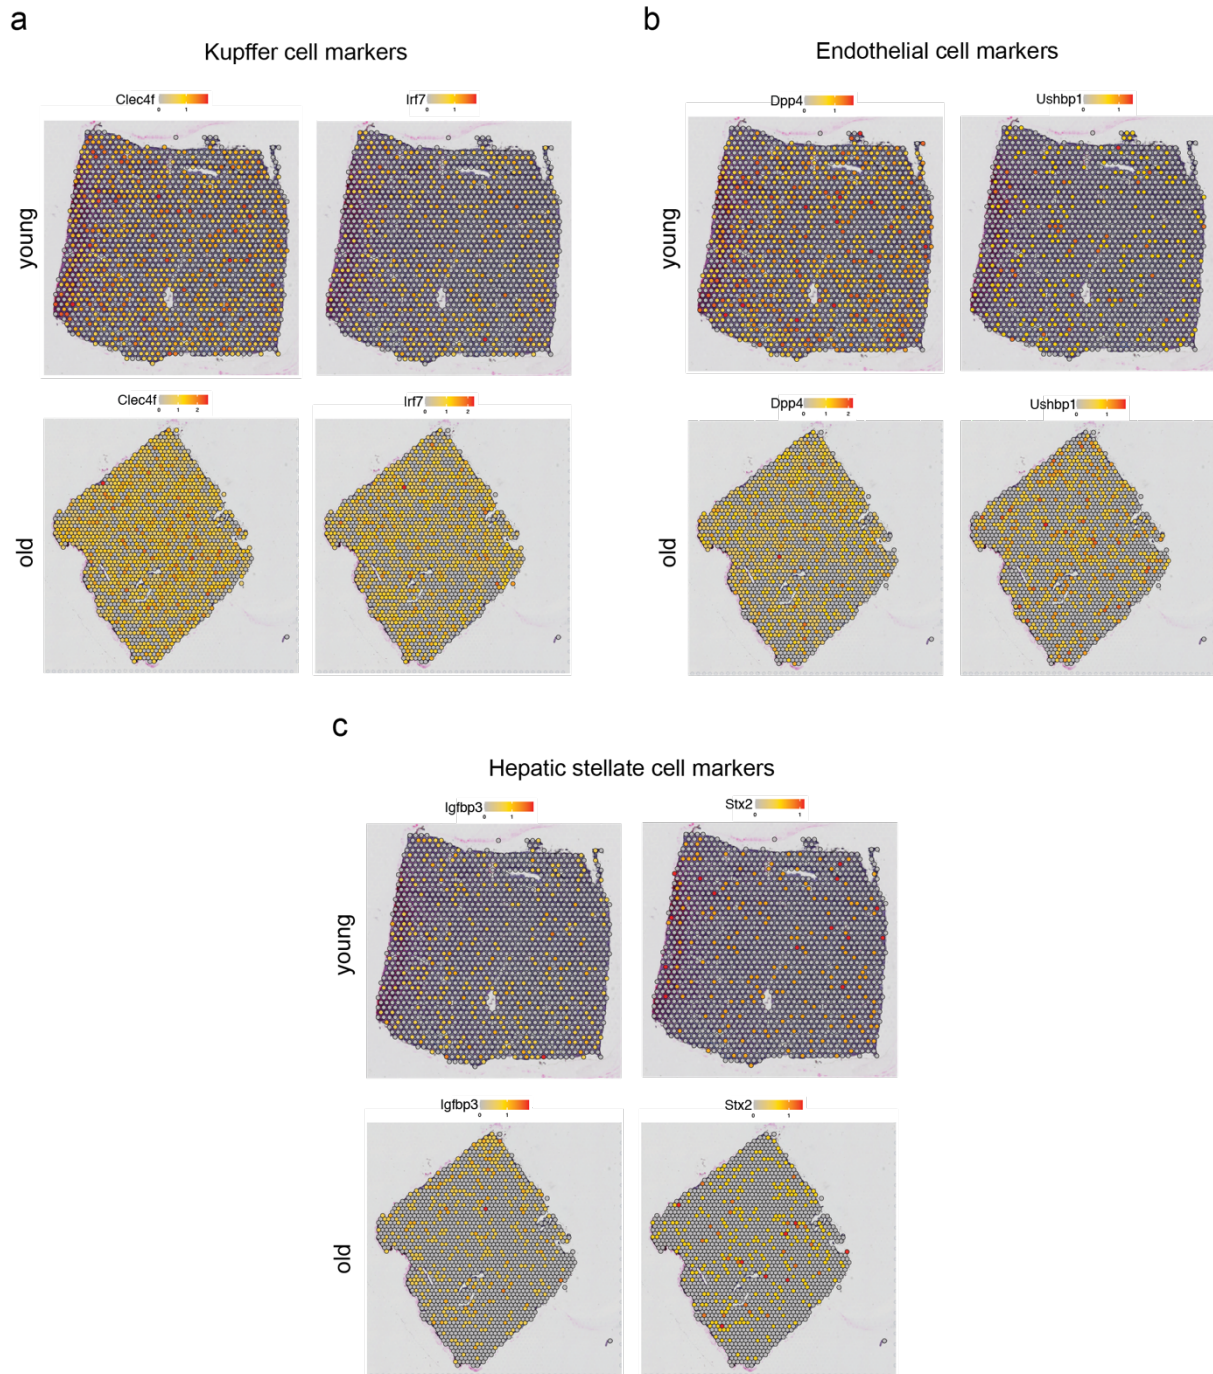

1095

1096 **Figure S6:** Representative plots showing expression levels of Kupffer cell (a), endothelial cell (b) and  
1097 hepatic stellate cell (c) markers as indicated in young and old livers as determined by spatial  
1098 transcriptomics. The colour gradient represents normalised gene expression.
